# Supplementary material for: Screening of wild species and transcriptome profiling to identify differentially regulated genes in response to late blight resistance in potato
Source: Frontiers journal article supplement (doi:10.3389/fpls.2023.1212135), 2023-07-12
Supplement: Data_Sheet_1.ZIP [file Data_Sheet_1.ZIP]

## Sheet: GO
ID	GO term accession
PGSC0003DMG400008796	GO:0004568
PGSC0003DMG400008796	GO:0016998
PGSC0003DMG400008796	GO:0006032
PGSC0003DMG400008796	GO:0008061
PGSC0003DMG400008796	GO:0005975
PGSC0003DMG400008796	GO:0005773
PGSC0003DMG400008796	GO:0050832
PGSC0003DMG401005942	GO:0016798
PGSC0003DMG401005942	GO:0004553
PGSC0003DMG401005942	GO:0005975
PGSC0003DMG401005942	GO:0016787
PGSC0003DMG401005942	GO:0008152
PGSC0003DMG401005942	GO:0005576
PGSC0003DMG401005942	GO:0008422
PGSC0003DMG401005942	GO:0009251
PGSC0003DMG400013984	GO:0005515
PGSC0003DMG400034790	GO:0004252
PGSC0003DMG400034790	GO:0016787
PGSC0003DMG400034790	GO:0008233
PGSC0003DMG400034790	GO:0006508
PGSC0003DMG400034790	GO:0008236
PGSC0003DMG400006368	GO:0005506
PGSC0003DMG400006368	GO:0016705
PGSC0003DMG400006368	GO:0004497
PGSC0003DMG400006368	GO:0020037
PGSC0003DMG400006368	GO:0016491
PGSC0003DMG400006368	GO:0046872
PGSC0003DMG400006368	GO:0055114
PGSC0003DMG400009267	GO:0010951
PGSC0003DMG400009267	GO:0004867
PGSC0003DMG402024140	GO:0005576
PGSC0003DMG402024140	GO:0005618
PGSC0003DMG402024140	GO:0016787
PGSC0003DMG402024140	GO:0071555
PGSC0003DMG402024140	GO:0009505
PGSC0003DMG402024140	GO:0052793
PGSC0003DMG400023922	GO:0005576
PGSC0003DMG400023922	GO:0009607
PGSC0003DMG400023922	GO:0006952
PGSC0003DMG400023922	GO:0005615
PGSC0003DMG400010137	GO:0010466
PGSC0003DMG400010137	GO:0030414
PGSC0003DMG400010137	GO:0010951
PGSC0003DMG400010137	GO:0004866
PGSC0003DMG400016623	GO:0005506
PGSC0003DMG400016623	GO:0016705
PGSC0003DMG400016623	GO:0004497
PGSC0003DMG400016623	GO:0020037
PGSC0003DMG400016623	GO:0016491
PGSC0003DMG400016623	GO:0046872
PGSC0003DMG400016623	GO:0055114
PGSC0003DMG400024399	GO:0016021
PGSC0003DMG400024399	GO:0016020
PGSC0003DMG400020341	GO:0005737
PGSC0003DMG400020341	GO:0043621
PGSC0003DMG400020341	GO:0051082
PGSC0003DMG400020341	GO:0006457
PGSC0003DMG400020341	GO:0009408
PGSC0003DMG400020341	GO:0009651
PGSC0003DMG400020341	GO:0042542
PGSC0003DMG400020341	GO:0051259
PGSC0003DMG400009512	GO:0010466
PGSC0003DMG400009512	GO:0030414
PGSC0003DMG400009512	GO:0010951
PGSC0003DMG400009512	GO:0004866
PGSC0003DMG400011752	GO:0097502
PGSC0003DMG400011752	GO:0016021
PGSC0003DMG400011752	GO:0030244
PGSC0003DMG400011752	GO:0016760
PGSC0003DMG400011752	GO:0071555
PGSC0003DMG400011752	GO:0016740
PGSC0003DMG400011752	GO:0016020
PGSC0003DMG400011752	GO:0016757
PGSC0003DMG400011752	GO:0005886
PGSC0003DMG400011752	GO:0005802
PGSC0003DMG400011752	GO:0051753
PGSC0003DMG400011752	GO:0009833
PGSC0003DMG401004840	GO:0016791
PGSC0003DMG401004840	GO:0046872
PGSC0003DMG401004840	GO:0016311
PGSC0003DMG400019256	GO:0005576
PGSC0003DMG400019256	GO:0045330
PGSC0003DMG400019256	GO:0005618
PGSC0003DMG400019256	GO:0030599
PGSC0003DMG400019256	GO:0004857
PGSC0003DMG400019256	GO:0042545
PGSC0003DMG400019256	GO:0045490
PGSC0003DMG400019256	GO:0016020
PGSC0003DMG400019256	GO:0016021
PGSC0003DMG400019256	GO:0043086
PGSC0003DMG400019256	GO:0016787
PGSC0003DMG400019256	GO:0071555
PGSC0003DMG400019256	GO:0046910
PGSC0003DMG400014007	GO:0005623
PGSC0003DMG400014007	GO:0045454
PGSC0003DMG400014007	GO:0003756
PGSC0003DMG400014007	GO:0016853
PGSC0003DMG400014007	GO:0005783
PGSC0003DMG400014007	GO:0005788
PGSC0003DMG400014007	GO:0006457
PGSC0003DMG400014007	GO:0034976
PGSC0003DMG400014007	GO:0018215
PGSC0003DMG400002110	GO:0010951
PGSC0003DMG400002110	GO:0004867
PGSC0003DMG400015804	GO:1901800
PGSC0003DMG400015804	GO:0000502
PGSC0003DMG400015804	GO:0005524
PGSC0003DMG400015804	GO:0016787
PGSC0003DMG400015804	GO:0030163
PGSC0003DMG400015804	GO:0005737
PGSC0003DMG400015804	GO:0000166
PGSC0003DMG400015804	GO:0016887
PGSC0003DMG400015804	GO:0017025
PGSC0003DMG400015804	GO:0008540
PGSC0003DMG400015804	GO:0036402
PGSC0003DMG402031759	GO:0006629
PGSC0003DMG402031759	GO:0008970
PGSC0003DMG402031759	GO:0016787
PGSC0003DMG402031759	GO:0016042
PGSC0003DMG400005113	GO:0005576
PGSC0003DMG400005113	GO:0009607
PGSC0003DMG400005113	GO:0006952
PGSC0003DMG400005113	GO:0005615
PGSC0003DMG400005717	GO:0010112
PGSC0003DMG400012704	GO:0016021
PGSC0003DMG400012704	GO:0016020
PGSC0003DMG400022075	GO:0016021
PGSC0003DMG400022075	GO:0005506
PGSC0003DMG400022075	GO:0016705
PGSC0003DMG400022075	GO:0004497
PGSC0003DMG400022075	GO:0020037
PGSC0003DMG400022075	GO:0016020
PGSC0003DMG400022075	GO:0016491
PGSC0003DMG400022075	GO:0046872
PGSC0003DMG400022075	GO:0055114
PGSC0003DMG401028570	GO:0003824
PGSC0003DMG401028570	GO:0016311
PGSC0003DMG401028570	GO:0016791
PGSC0003DMG400028182	GO:0016021
PGSC0003DMG400028182	GO:0006833
PGSC0003DMG400028182	GO:0015267
PGSC0003DMG400028182	GO:0016020
PGSC0003DMG400028182	GO:0055085
PGSC0003DMG400028182	GO:0015250
PGSC0003DMG400015290	GO:0010951
PGSC0003DMG400015290	GO:0004867
PGSC0003DMG400021142	GO:0016021
PGSC0003DMG400021142	GO:0071949
PGSC0003DMG400021142	GO:0016491
PGSC0003DMG400021142	GO:0016020
PGSC0003DMG400021142	GO:0050660
PGSC0003DMG400021142	GO:0055114
PGSC0003DMG400021142	GO:0005737
PGSC0003DMG400021142	GO:0016628
PGSC0003DMG400021142	GO:0008202
PGSC0003DMG400021142	GO:0050614
PGSC0003DMG400015591	GO:0016021
PGSC0003DMG400015591	GO:0022857
PGSC0003DMG400015591	GO:0006817
PGSC0003DMG400015591	GO:0006857
PGSC0003DMG400015591	GO:0016020
PGSC0003DMG400015591	GO:0055085
PGSC0003DMG400015591	GO:0005886
PGSC0003DMG400005762	GO:0010112
PGSC0003DMG400004549	GO:0016021
PGSC0003DMG400004549	GO:0016020
PGSC0003DMG400020377	GO:0016021
PGSC0003DMG400020377	GO:0016020
PGSC0003DMG400020377	GO:0003677
PGSC0003DMG400030165	GO:0016021
PGSC0003DMG400030165	GO:0016020
PGSC0003DMG400019068	GO:0006952
PGSC0003DMG400017106	GO:0016021
PGSC0003DMG400017106	GO:0016310
PGSC0003DMG400017106	GO:0004674
PGSC0003DMG400017106	GO:0005509
PGSC0003DMG400017106	GO:0005524
PGSC0003DMG400017106	GO:0030247
PGSC0003DMG400017106	GO:0016740
PGSC0003DMG400017106	GO:0000166
PGSC0003DMG400017106	GO:0004672
PGSC0003DMG400017106	GO:0016301
PGSC0003DMG400017106	GO:0006468
PGSC0003DMG400017106	GO:0016020
PGSC0003DMG400010899	GO:0003924
PGSC0003DMG400010899	GO:0005525
PGSC0003DMG400010899	GO:0000166
PGSC0003DMG400010899	GO:0005737
PGSC0003DMG400010899	GO:0016020
PGSC0003DMG400010899	GO:0008017
PGSC0003DMG400010899	GO:0000266
PGSC0003DMG400010899	GO:0048285
PGSC0003DMG400021131	GO:0016021
PGSC0003DMG400021131	GO:0016020
PGSC0003DMG400021131	GO:0005524
PGSC0003DMG400021131	GO:0000166
PGSC0003DMG400021131	GO:0016887
PGSC0003DMG400030793	GO:0006413
PGSC0003DMG400030793	GO:0006412
PGSC0003DMG400030793	GO:0003924
PGSC0003DMG400030793	GO:0005525
PGSC0003DMG400030793	GO:0000166
PGSC0003DMG400030793	GO:0003743
PGSC0003DMG400002156	GO:0005506
PGSC0003DMG400002156	GO:0008610
PGSC0003DMG400002156	GO:0016491
PGSC0003DMG400002156	GO:0055114
PGSC0003DMG400002156	GO:0016021
PGSC0003DMG400002156	GO:0016020
PGSC0003DMG400002156	GO:0005789
PGSC0003DMG400002156	GO:0000254
PGSC0003DMG400002156	GO:0016126
PGSC0003DMG400002156	GO:0080065
PGSC0003DMG400003340	GO:0016021
PGSC0003DMG400003340	GO:0005506
PGSC0003DMG400003340	GO:0016705
PGSC0003DMG400003340	GO:0004497
PGSC0003DMG400003340	GO:0020037
PGSC0003DMG400003340	GO:0016020
PGSC0003DMG400003340	GO:0016491
PGSC0003DMG400003340	GO:0046872
PGSC0003DMG400003340	GO:0055114
PGSC0003DMG400026871	GO:0005506
PGSC0003DMG400026871	GO:0016705
PGSC0003DMG400026871	GO:0004497
PGSC0003DMG400026871	GO:0020037
PGSC0003DMG400026871	GO:0016491
PGSC0003DMG400026871	GO:0046872
PGSC0003DMG400026871	GO:0055114
PGSC0003DMG402021713	GO:0010333
PGSC0003DMG402021713	GO:0016829
PGSC0003DMG400020023	GO:0016021
PGSC0003DMG400020023	GO:0016310
PGSC0003DMG400020023	GO:0005509
PGSC0003DMG400020023	GO:0005524
PGSC0003DMG400020023	GO:0030247
PGSC0003DMG400020023	GO:0004672
PGSC0003DMG400020023	GO:0016740
PGSC0003DMG400020023	GO:0000166
PGSC0003DMG400020023	GO:0004674
PGSC0003DMG400020023	GO:0016301
PGSC0003DMG400020023	GO:0006468
PGSC0003DMG400020023	GO:0016020
PGSC0003DMG400020023	GO:0005886
PGSC0003DMG400020023	GO:0007166
PGSC0003DMG400003032	GO:0016021
PGSC0003DMG400003032	GO:0005506
PGSC0003DMG400003032	GO:0016705
PGSC0003DMG400003032	GO:0004497
PGSC0003DMG400003032	GO:0020037
PGSC0003DMG400003032	GO:0016020
PGSC0003DMG400003032	GO:0016491
PGSC0003DMG400003032	GO:0046872
PGSC0003DMG400003032	GO:0055114
PGSC0003DMG400012089	GO:0010466
PGSC0003DMG400012089	GO:0030414
PGSC0003DMG400012089	GO:0010951
PGSC0003DMG400012089	GO:0004867
PGSC0003DMG400012089	GO:0009611
PGSC0003DMG400008850	GO:0055114
PGSC0003DMG402023841	GO:0016021
PGSC0003DMG402023841	GO:0005506
PGSC0003DMG402023841	GO:0008610
PGSC0003DMG402023841	GO:0016491
PGSC0003DMG402023841	GO:0016020
PGSC0003DMG402023841	GO:0055114
PGSC0003DMG402023841	GO:0005789
PGSC0003DMG402023841	GO:0000254
PGSC0003DMG402023841	GO:0016126
PGSC0003DMG400023184	GO:0005515
PGSC0003DMG400023184	GO:0005634
PGSC0003DMG400023184	GO:0005737
PGSC0003DMG400023184	GO:0031386
PGSC0003DMG400023184	GO:0016567
PGSC0003DMG400023184	GO:0031625
PGSC0003DMG400023184	GO:0019941
PGSC0003DMG400004548	GO:0010951
PGSC0003DMG400004548	GO:0004867
PGSC0003DMG400004548	GO:0016021
PGSC0003DMG400004548	GO:0016020
PGSC0003DMG402001531	GO:0004568
PGSC0003DMG402001531	GO:0016998
PGSC0003DMG402001531	GO:0006032
PGSC0003DMG402001531	GO:0005975
PGSC0003DMG402001531	GO:0050832
PGSC0003DMG400026417	GO:0098807
PGSC0003DMG400026417	GO:0007623
PGSC0003DMG400026417	GO:0009507
PGSC0003DMG400001407	GO:0005524
PGSC0003DMG400001407	GO:0000166
PGSC0003DMG400001407	GO:0016887
PGSC0003DMG401019255	GO:0005576
PGSC0003DMG401019255	GO:0045330
PGSC0003DMG401019255	GO:0005618
PGSC0003DMG401019255	GO:0030599
PGSC0003DMG401019255	GO:0042545
PGSC0003DMG401019255	GO:0045490
PGSC0003DMG401019255	GO:0043086
PGSC0003DMG401019255	GO:0016787
PGSC0003DMG401019255	GO:0071555
PGSC0003DMG401019255	GO:0046910
PGSC0003DMG400034322	GO:0003676
PGSC0003DMG400004629	GO:0003824
PGSC0003DMG400004629	GO:0016787
PGSC0003DMG400010490	GO:0016798
PGSC0003DMG400010490	GO:0004553
PGSC0003DMG400010490	GO:0005975
PGSC0003DMG400010490	GO:0006952
PGSC0003DMG400010490	GO:0016787
PGSC0003DMG400010490	GO:0008152
PGSC0003DMG400010490	GO:0046658
PGSC0003DMG400011792	GO:0016021
PGSC0003DMG400011792	GO:0016310
PGSC0003DMG400011792	GO:0005509
PGSC0003DMG400011792	GO:0005524
PGSC0003DMG400011792	GO:0030247
PGSC0003DMG400011792	GO:0004672
PGSC0003DMG400011792	GO:0016740
PGSC0003DMG400011792	GO:0000166
PGSC0003DMG400011792	GO:0004674
PGSC0003DMG400011792	GO:0016301
PGSC0003DMG400011792	GO:0006468
PGSC0003DMG400011792	GO:0016020
PGSC0003DMG400011792	GO:0005886
PGSC0003DMG400011792	GO:0007166
PGSC0003DMG401008167	GO:0003700
PGSC0003DMG401008167	GO:0006355
PGSC0003DMG401008167	GO:0043565
PGSC0003DMG401008167	GO:0005634
PGSC0003DMG401008167	GO:0003677
PGSC0003DMG401008167	GO:0000978
PGSC0003DMG401008167	GO:0006357
PGSC0003DMG400027888	GO:0008234
PGSC0003DMG400027888	GO:0016787
PGSC0003DMG400027888	GO:0008233
PGSC0003DMG400027888	GO:0006508
PGSC0003DMG400027888	GO:0005615
PGSC0003DMG400027888	GO:0004197
PGSC0003DMG400027888	GO:0051603
PGSC0003DMG400027888	GO:0005764
PGSC0003DMG405015682	GO:0005634
PGSC0003DMG405015682	GO:0005737
PGSC0003DMG400025042	GO:0016021
PGSC0003DMG400025042	GO:0009055
PGSC0003DMG400025042	GO:0016020
PGSC0003DMG400025042	GO:0022900
PGSC0003DMG400025042	GO:0046658
PGSC0003DMG400009268	GO:0010951
PGSC0003DMG400009268	GO:0004867
PGSC0003DMG400000193	GO:0030170
PGSC0003DMG400000193	GO:0042218
PGSC0003DMG400000193	GO:0016829
PGSC0003DMG400000193	GO:0003824
PGSC0003DMG400000193	GO:0009058
PGSC0003DMG400000193	GO:0016847
PGSC0003DMG400010129	GO:0010466
PGSC0003DMG400010129	GO:0030414
PGSC0003DMG400010129	GO:0010951
PGSC0003DMG400010129	GO:0004866
PGSC0003DMG400017007	GO:0016021
PGSC0003DMG400017007	GO:0016020
PGSC0003DMG400004008	GO:0031519
PGSC0003DMG400004008	GO:0005634
PGSC0003DMG400004008	GO:0005515
PGSC0003DMG400021438	GO:0016021
PGSC0003DMG400021438	GO:0016020
PGSC0003DMG400021438	GO:0038023
PGSC0003DMG400021438	GO:0009725
PGSC0003DMG400010901	GO:0005886
PGSC0003DMG400026778	GO:0005506
PGSC0003DMG400026778	GO:0016705
PGSC0003DMG400026778	GO:0004497
PGSC0003DMG400026778	GO:0020037
PGSC0003DMG400026778	GO:0016491
PGSC0003DMG400026778	GO:0046872
PGSC0003DMG400026778	GO:0055114
PGSC0003DMG400025398	GO:0006412
PGSC0003DMG400025398	GO:0005840
PGSC0003DMG400025398	GO:0015935
PGSC0003DMG400025398	GO:0003735
PGSC0003DMG400025398	GO:0022627
PGSC0003DMG400021785	GO:0016758
PGSC0003DMG400021785	GO:0016740
PGSC0003DMG400021785	GO:0016757
PGSC0003DMG400021785	GO:0008194
PGSC0003DMG400021785	GO:0080043
PGSC0003DMG400021785	GO:0080044
PGSC0003DMG400024167	GO:0005515
PGSC0003DMG400024167	GO:0045036
PGSC0003DMG400024167	GO:0031359
PGSC0003DMG400024167	GO:0030941
PGSC0003DMG400024978	GO:0005737
PGSC0003DMG400024978	GO:0016881
PGSC0003DMG400029195	GO:0008199
PGSC0003DMG400029195	GO:0005623
PGSC0003DMG400029195	GO:0006826
PGSC0003DMG400029195	GO:0006879
PGSC0003DMG400029195	GO:0004322
PGSC0003DMG400029195	GO:0009507
PGSC0003DMG400029195	GO:0016491
PGSC0003DMG400029195	GO:0046872
PGSC0003DMG400029195	GO:0055114
PGSC0003DMG400029195	GO:0005737
PGSC0003DMG400029195	GO:0006880
PGSC0003DMG400029195	GO:0008198
PGSC0003DMG400008724	GO:0016491
PGSC0003DMG400008724	GO:0055114
PGSC0003DMG400013552	GO:0016021
PGSC0003DMG400013552	GO:0016020
PGSC0003DMG400008801	GO:0003924
PGSC0003DMG400008801	GO:0005525
PGSC0003DMG400008801	GO:0000049
PGSC0003DMG400008801	GO:0006413
PGSC0003DMG400008801	GO:0000166
PGSC0003DMG400008801	GO:0003743
PGSC0003DMG400008801	GO:0045903
PGSC0003DMG400008801	GO:0005829
PGSC0003DMG400008801	GO:0001731
PGSC0003DMG400008801	GO:0005850
PGSC0003DMG401026661	GO:0005515
PGSC0003DMG400029242	GO:0016021
PGSC0003DMG400029242	GO:0022857
PGSC0003DMG400029242	GO:0006817
PGSC0003DMG400029242	GO:0006857
PGSC0003DMG400029242	GO:0016020
PGSC0003DMG400029242	GO:0055085
PGSC0003DMG402001926	GO:0016021
PGSC0003DMG402001926	GO:0022857
PGSC0003DMG402001926	GO:0006817
PGSC0003DMG402001926	GO:0016020
PGSC0003DMG402001926	GO:0055085
PGSC0003DMG402001926	GO:0005886
PGSC0003DMG400014736	GO:0016021
PGSC0003DMG400014736	GO:0016020
PGSC0003DMG400014736	GO:0005515
PGSC0003DMG402024222	GO:0005524
PGSC0003DMG402024222	GO:0004672
PGSC0003DMG402024222	GO:0006468
PGSC0003DMG402024222	GO:0016021
PGSC0003DMG402024222	GO:0016020
PGSC0003DMG400013227	GO:0016020
PGSC0003DMG400013227	GO:0016021
PGSC0003DMG400013227	GO:0005576
PGSC0003DMG400013227	GO:0006952
PGSC0003DMG402029202	GO:0010333
PGSC0003DMG402029202	GO:0000287
PGSC0003DMG402029202	GO:0016829
PGSC0003DMG402029202	GO:0003676
PGSC0003DMG400015678	GO:0008270
PGSC0003DMG400015678	GO:0016491
PGSC0003DMG400015678	GO:0046872
PGSC0003DMG400015678	GO:0055114
PGSC0003DMG400015678	GO:0016616
PGSC0003DMG400015678	GO:0045551
PGSC0003DMG400015678	GO:0009809
PGSC0003DMG400023235	GO:0006952
PGSC0003DMG400018591	GO:0055114
PGSC0003DMG400018591	GO:0016020
PGSC0003DMG400025878	GO:0016758
PGSC0003DMG400025878	GO:0016740
PGSC0003DMG400025878	GO:0016757
PGSC0003DMG400025878	GO:0008194
PGSC0003DMG400017135	GO:0005506
PGSC0003DMG400017135	GO:0016705
PGSC0003DMG400017135	GO:0020037
PGSC0003DMG400017135	GO:0055114
PGSC0003DMG400017135	GO:0004497
PGSC0003DMG400017135	GO:0016491
PGSC0003DMG400017135	GO:0046872
PGSC0003DMG400002026	GO:0005524
PGSC0003DMG400002026	GO:0003777
PGSC0003DMG400002026	GO:0008017
PGSC0003DMG400002026	GO:0007018
PGSC0003DMG400002026	GO:0005874
PGSC0003DMG400002026	GO:0000166
PGSC0003DMG400002026	GO:0003774
PGSC0003DMG400002026	GO:0008574
PGSC0003DMG402031520	GO:0005506
PGSC0003DMG402031520	GO:0016705
PGSC0003DMG402031520	GO:0020037
PGSC0003DMG402031520	GO:0055114
PGSC0003DMG402031520	GO:0004497
PGSC0003DMG402031520	GO:0016491
PGSC0003DMG402031520	GO:0046872
PGSC0003DMG400005269	GO:0016021
PGSC0003DMG400005269	GO:0022857
PGSC0003DMG400005269	GO:0016020
PGSC0003DMG400005269	GO:0055085
PGSC0003DMG400005269	GO:0031969
PGSC0003DMG400005269	GO:0005794
PGSC0003DMG400005269	GO:0015297
PGSC0003DMG400005269	GO:0015120
PGSC0003DMG400005269	GO:0071917
PGSC0003DMG400005269	GO:0015713
PGSC0003DMG400005269	GO:0035436
PGSC0003DMG400029934	GO:0016021
PGSC0003DMG400029934	GO:0006629
PGSC0003DMG400029934	GO:0016491
PGSC0003DMG400029934	GO:0016020
PGSC0003DMG400029934	GO:0055114
PGSC0003DMG400005226	GO:0016021
PGSC0003DMG400005226	GO:0016020
PGSC0003DMG400005226	GO:0005886
PGSC0003DMG400005226	GO:0005515
PGSC0003DMG400026722	GO:0006511
PGSC0003DMG400026722	GO:0016567
PGSC0003DMG400026722	GO:0097602
PGSC0003DMG400026722	GO:0005634
PGSC0003DMG400026722	GO:0005737
PGSC0003DMG400026722	GO:0031146
PGSC0003DMG400015154	GO:0003824
PGSC0003DMG400015154	GO:0005975
PGSC0003DMG400016257	GO:0016021
PGSC0003DMG400016257	GO:0016020
PGSC0003DMG400008761	GO:0003677
PGSC0003DMG400008761	GO:0005634
PGSC0003DMG400008761	GO:0043565
PGSC0003DMG400008761	GO:0006355
PGSC0003DMG400016108	GO:0016787
PGSC0003DMG400007471	GO:0043531
PGSC0003DMG400005931	GO:0016126
PGSC0003DMG400005931	GO:0016021
PGSC0003DMG400005931	GO:0016628
PGSC0003DMG400005931	GO:0016020
PGSC0003DMG400005931	GO:0016491
PGSC0003DMG400005931	GO:0055114
PGSC0003DMG400005931	GO:0006629
PGSC0003DMG400005931	GO:0006694
PGSC0003DMG400005931	GO:0008202
PGSC0003DMG400005931	GO:0030176
PGSC0003DMG400005931	GO:0016132
PGSC0003DMG400005931	GO:0016627
PGSC0003DMG400005931	GO:0009918
PGSC0003DMG400031118	GO:0055114
PGSC0003DMG400013830	GO:0006952
PGSC0003DMG400019472	GO:0006878
PGSC0003DMG400019472	GO:0030001
PGSC0003DMG400019472	GO:0046686
PGSC0003DMG400019472	GO:0048046
PGSC0003DMG400019472	GO:0009507
PGSC0003DMG400019472	GO:0046872
PGSC0003DMG400019472	GO:0009651
PGSC0003DMG400019472	GO:0019904
PGSC0003DMG400011542	GO:0004185
PGSC0003DMG400011542	GO:0006508
PGSC0003DMG400011542	GO:0016747
PGSC0003DMG400011542	GO:0019748
PGSC0003DMG400016776	GO:0005506
PGSC0003DMG400016776	GO:0016705
PGSC0003DMG400016776	GO:0004497
PGSC0003DMG400016776	GO:0020037
PGSC0003DMG400016776	GO:0016491
PGSC0003DMG400016776	GO:0046872
PGSC0003DMG400016776	GO:0055114
PGSC0003DMG402019255	GO:0005576
PGSC0003DMG402019255	GO:0045330
PGSC0003DMG402019255	GO:0005618
PGSC0003DMG402019255	GO:0030599
PGSC0003DMG402019255	GO:0004857
PGSC0003DMG402019255	GO:0042545
PGSC0003DMG402019255	GO:0045490
PGSC0003DMG402019255	GO:0043086
PGSC0003DMG402019255	GO:0016787
PGSC0003DMG402019255	GO:0071555
PGSC0003DMG402019255	GO:0046910
PGSC0003DMG400013143	GO:0006952
PGSC0003DMG400013143	GO:0032515
PGSC0003DMG400013143	GO:0005634
PGSC0003DMG400013143	GO:0005737
PGSC0003DMG400013143	GO:0004864
PGSC0003DMG400013143	GO:0010427
PGSC0003DMG400013143	GO:0038023
PGSC0003DMG400013143	GO:0009738
PGSC0003DMG400013143	GO:0080163
PGSC0003DMG400001598	GO:0005576
PGSC0003DMG400001598	GO:0006952
PGSC0003DMG400001598	GO:0005618
PGSC0003DMG400026277	GO:0046872
PGSC0003DMG400026277	GO:0016491
PGSC0003DMG400026277	GO:0055114
PGSC0003DMG400026277	GO:0031418
PGSC0003DMG400002028	GO:0005576
PGSC0003DMG400002028	GO:0009607
PGSC0003DMG400002028	GO:0006952
PGSC0003DMG400002028	GO:0005615
PGSC0003DMG400014702	GO:0005515
PGSC0003DMG400000676	GO:0090502
PGSC0003DMG400000676	GO:0090501
PGSC0003DMG400000676	GO:0006396
PGSC0003DMG400000676	GO:0004525
PGSC0003DMG400000676	GO:0003723
PGSC0003DMG400000676	GO:0005634
PGSC0003DMG400000676	GO:0005737
PGSC0003DMG400000676	GO:0030422
PGSC0003DMG400000676	GO:0016021
PGSC0003DMG400000676	GO:0016020
PGSC0003DMG400013721	GO:0043531
PGSC0003DMG400017513	GO:0008777
PGSC0003DMG400017513	GO:0006592
PGSC0003DMG400017513	GO:0005829
PGSC0003DMG400017513	GO:0016787
PGSC0003DMG400002321	GO:0031418
PGSC0003DMG400002321	GO:0051365
PGSC0003DMG400002321	GO:0071398
PGSC0003DMG400002321	GO:0046872
PGSC0003DMG400002321	GO:0016491
PGSC0003DMG400002321	GO:0071281
PGSC0003DMG400002321	GO:0071732
PGSC0003DMG400002321	GO:0055114
PGSC0003DMG400011085	GO:0016021
PGSC0003DMG400011085	GO:0022857
PGSC0003DMG400011085	GO:0006817
PGSC0003DMG400011085	GO:0016020
PGSC0003DMG400011085	GO:0055085
PGSC0003DMG400011085	GO:0006857
PGSC0003DMG400013231	GO:0016021
PGSC0003DMG400013231	GO:0005509
PGSC0003DMG400013231	GO:0016020
PGSC0003DMG400013231	GO:0048306
PGSC0003DMG400022911	GO:0016788
PGSC0003DMG400022911	GO:0080030
PGSC0003DMG400022911	GO:0080031
PGSC0003DMG400022911	GO:0080032
PGSC0003DMG400022911	GO:0009694
PGSC0003DMG400022911	GO:0009696
PGSC0003DMG400023020	GO:0006412
PGSC0003DMG400023020	GO:0005840
PGSC0003DMG400023020	GO:0003735
PGSC0003DMG400023020	GO:0022627
PGSC0003DMG400006709	GO:0016787
PGSC0003DMG400007462	GO:0043531
PGSC0003DMG400007462	GO:0006952
PGSC0003DMG400004029	GO:0016747
PGSC0003DMG401010883	GO:0003677
PGSC0003DMG401010883	GO:0005634
PGSC0003DMG401010883	GO:0043565
PGSC0003DMG401010883	GO:0006355
PGSC0003DMG400003757	GO:0003993
PGSC0003DMG400003757	GO:0009505
PGSC0003DMG400003757	GO:0016036
PGSC0003DMG400003757	GO:0005829
PGSC0003DMG400003757	GO:0046872
PGSC0003DMG400003757	GO:0016787
PGSC0003DMG400003757	GO:0016311
PGSC0003DMG400029505	GO:0043531
PGSC0003DMG400029505	GO:0006952
PGSC0003DMG400010002	GO:0000776
PGSC0003DMG400010002	GO:0031262
PGSC0003DMG400010002	GO:0005886
PGSC0003DMG400010002	GO:0005774
PGSC0003DMG400010002	GO:0007049
PGSC0003DMG400010002	GO:0051301
PGSC0003DMG400010002	GO:0000778
PGSC0003DMG400010002	GO:0044877
PGSC0003DMG400010002	GO:0007052
PGSC0003DMG400010002	GO:0051315
PGSC0003DMG400010002	GO:0045132
PGSC0003DMG400010002	GO:0051383
PGSC0003DMG400010995	GO:0005506
PGSC0003DMG400010995	GO:0016705
PGSC0003DMG400010995	GO:0004497
PGSC0003DMG400010995	GO:0020037
PGSC0003DMG400010995	GO:0016491
PGSC0003DMG400010995	GO:0046872
PGSC0003DMG400010995	GO:0055114
PGSC0003DMG400017508	GO:0016758
PGSC0003DMG400017508	GO:0016740
PGSC0003DMG400017508	GO:0016757
PGSC0003DMG400017508	GO:0035251
PGSC0003DMG400017508	GO:0008194
PGSC0003DMG400033662	GO:0016021
PGSC0003DMG400033662	GO:0016020
PGSC0003DMG400020497	GO:0005576
PGSC0003DMG400011751	GO:0046872
PGSC0003DMG400011751	GO:0016491
PGSC0003DMG400011751	GO:0055114
PGSC0003DMG400011751	GO:0031418
PGSC0003DMG400029572	GO:0016021
PGSC0003DMG400029572	GO:0016020
PGSC0003DMG400029572	GO:0005886
PGSC0003DMG400029572	GO:0005515
PGSC0003DMG400013577	GO:0050661
PGSC0003DMG400013577	GO:0004499
PGSC0003DMG400013577	GO:0050660
PGSC0003DMG400013577	GO:0004497
PGSC0003DMG400013577	GO:0016491
PGSC0003DMG400013577	GO:0055114
PGSC0003DMG400008299	GO:0016021
PGSC0003DMG400008299	GO:0016168
PGSC0003DMG400008299	GO:0009765
PGSC0003DMG400008299	GO:0009523
PGSC0003DMG400008299	GO:0018298
PGSC0003DMG400008299	GO:0009522
PGSC0003DMG400008299	GO:0009535
PGSC0003DMG400008299	GO:0016020
PGSC0003DMG400008299	GO:0009507
PGSC0003DMG400008299	GO:0009536
PGSC0003DMG400008299	GO:0015979
PGSC0003DMG400008299	GO:0009579
PGSC0003DMG400008299	GO:0009416
PGSC0003DMG400008299	GO:0009941
PGSC0003DMG400008299	GO:0009768
PGSC0003DMG400008299	GO:0010287
PGSC0003DMG400016996	GO:0016021
PGSC0003DMG400016996	GO:0015706
PGSC0003DMG400016996	GO:0006817
PGSC0003DMG400016996	GO:0005886
PGSC0003DMG400016996	GO:0055085
PGSC0003DMG400016996	GO:0016020
PGSC0003DMG400016996	GO:0022857
PGSC0003DMG400016996	GO:0009705
PGSC0003DMG400016996	GO:0015112
PGSC0003DMG400016996	GO:0071249
PGSC0003DMG400025620	GO:0005515
PGSC0003DMG400025620	GO:0005737
PGSC0003DMG400025620	GO:0042594
PGSC0003DMG400002045	GO:0016310
PGSC0003DMG400002045	GO:0005524
PGSC0003DMG400002045	GO:0004672
PGSC0003DMG400002045	GO:0016740
PGSC0003DMG400002045	GO:0000166
PGSC0003DMG400002045	GO:0016301
PGSC0003DMG400002045	GO:0006468
PGSC0003DMG400002045	GO:0016020
PGSC0003DMG400002045	GO:0046777
PGSC0003DMG400002045	GO:0004674
PGSC0003DMG400002045	GO:0005886
PGSC0003DMG402008909	GO:0046872
PGSC0003DMG400026401	GO:0016021
PGSC0003DMG400026401	GO:0005506
PGSC0003DMG400026401	GO:0008610
PGSC0003DMG400026401	GO:0016491
PGSC0003DMG400026401	GO:0016020
PGSC0003DMG400026401	GO:0055114
PGSC0003DMG400026401	GO:0005789
PGSC0003DMG400026401	GO:0016126
PGSC0003DMG400026401	GO:0000248
PGSC0003DMG400029291	GO:0071569
PGSC0003DMG400029291	GO:0005634
PGSC0003DMG400029291	GO:0005737
PGSC0003DMG400029291	GO:1990592
PGSC0003DMG400006956	GO:0016829
PGSC0003DMG400006956	GO:0004089
PGSC0003DMG400006956	GO:0015976
PGSC0003DMG400006956	GO:0008270
PGSC0003DMG400012763	GO:0016021
PGSC0003DMG400012763	GO:0005506
PGSC0003DMG400012763	GO:0008610
PGSC0003DMG400012763	GO:0016491
PGSC0003DMG400012763	GO:0016020
PGSC0003DMG400012763	GO:0055114
PGSC0003DMG400012763	GO:0005789
PGSC0003DMG400012763	GO:0000254
PGSC0003DMG400012763	GO:0016126
PGSC0003DMG400025856	GO:0005737
PGSC0003DMG400025856	GO:0016881
PGSC0003DMG402028570	GO:0003824
PGSC0003DMG402028570	GO:0016311
PGSC0003DMG402028570	GO:0016791
PGSC0003DMG400014299	GO:0006412
PGSC0003DMG400014299	GO:0005840
PGSC0003DMG400014299	GO:0003735
PGSC0003DMG400014299	GO:0022627
PGSC0003DMG400014558	GO:0010112
PGSC0003DMG400014558	GO:0005634
PGSC0003DMG400046796	GO:0005524
PGSC0003DMG400046796	GO:0004672
PGSC0003DMG400046796	GO:0006468
PGSC0003DMG400046796	GO:0004674
PGSC0003DMG400046796	GO:0005886
PGSC0003DMG400011750	GO:0005506
PGSC0003DMG400011750	GO:0016705
PGSC0003DMG400011750	GO:0004497
PGSC0003DMG400011750	GO:0020037
PGSC0003DMG400011750	GO:0016491
PGSC0003DMG400011750	GO:0046872
PGSC0003DMG400011750	GO:0055114
PGSC0003DMG400007098	GO:0006970
PGSC0003DMG400007098	GO:0006995
PGSC0003DMG400006369	GO:0003700
PGSC0003DMG400006369	GO:0003677
PGSC0003DMG400006369	GO:0006355
PGSC0003DMG400006369	GO:0006351
PGSC0003DMG400006369	GO:0005634
PGSC0003DMG400006369	GO:0006952
PGSC0003DMG400010753	GO:0003700
PGSC0003DMG400010753	GO:0003677
PGSC0003DMG400010753	GO:0006355
PGSC0003DMG400010753	GO:0006351
PGSC0003DMG400010753	GO:0005634
PGSC0003DMG400010753	GO:0006952
PGSC0003DMG400026586	GO:0016021
PGSC0003DMG400026586	GO:0005506
PGSC0003DMG400026586	GO:0016705
PGSC0003DMG400026586	GO:0004497
PGSC0003DMG400026586	GO:0020037
PGSC0003DMG400026586	GO:0016020
PGSC0003DMG400026586	GO:0016491
PGSC0003DMG400026586	GO:0046872
PGSC0003DMG400026586	GO:0055114
PGSC0003DMG400026683	GO:0005737
PGSC0003DMG400026683	GO:0016881
PGSC0003DMG400018865	GO:0005515
PGSC0003DMG400044149	GO:0016758
PGSC0003DMG400044149	GO:0016740
PGSC0003DMG400044149	GO:0016757
PGSC0003DMG400044149	GO:0008194
PGSC0003DMG400000101	GO:0006629
PGSC0003DMG400000101	GO:0016787
PGSC0003DMG400000101	GO:0008970
PGSC0003DMG400028173	GO:0005576
PGSC0003DMG400028173	GO:0008283
PGSC0003DMG400028173	GO:0008083
PGSC0003DMG400028173	GO:0007165
PGSC0003DMG400028173	GO:0030154
PGSC0003DMG400031156	GO:0005515
PGSC0003DMG400009115	GO:0016021
PGSC0003DMG400009115	GO:0030247
PGSC0003DMG400009115	GO:0016020
PGSC0003DMG400019418	GO:0043531
PGSC0003DMG400019418	GO:0006952
PGSC0003DMG400021270	GO:0016021
PGSC0003DMG400021270	GO:0016020
PGSC0003DMG400011235	GO:0016020
PGSC0003DMG400011235	GO:0012505
PGSC0003DMG400005590	GO:0016021
PGSC0003DMG400005590	GO:0016020
PGSC0003DMG400005590	GO:0005515
PGSC0003DMG400022936	GO:0005524
PGSC0003DMG400022936	GO:0000166
PGSC0003DMG400022936	GO:0016887
PGSC0003DMG400008419	GO:0016021
PGSC0003DMG400008419	GO:0004672
PGSC0003DMG400008419	GO:0016020
PGSC0003DMG400008419	GO:0005524
PGSC0003DMG400008419	GO:0006468
PGSC0003DMG400002123	GO:0016021
PGSC0003DMG400002123	GO:0015297
PGSC0003DMG400002123	GO:0015238
PGSC0003DMG400002123	GO:0042910
PGSC0003DMG400002123	GO:0042908
PGSC0003DMG400002123	GO:0016020
PGSC0003DMG400002123	GO:0055085
PGSC0003DMG400002123	GO:0022857
PGSC0003DMG400002027	GO:0005576
PGSC0003DMG400002027	GO:0009607
PGSC0003DMG400002027	GO:0006952
PGSC0003DMG400002027	GO:0005615
PGSC0003DMG400023979	GO:0042030
PGSC0003DMG400023979	GO:0032780
PGSC0003DMG400023979	GO:0005739
PGSC0003DMG400023979	GO:0005747
PGSC0003DMG400010207	GO:0010282
PGSC0003DMG400010207	GO:0010623
PGSC0003DMG400010207	GO:0080187
PGSC0003DMG400010207	GO:1990169
PGSC0003DMG400010207	GO:0009744
PGSC0003DMG400010207	GO:0009750
PGSC0003DMG400010207	GO:0010150
PGSC0003DMG400010207	GO:0008234
PGSC0003DMG400010207	GO:0009817
PGSC0003DMG400010207	GO:0010224
PGSC0003DMG400010207	GO:0009626
PGSC0003DMG400010207	GO:0009749
PGSC0003DMG400010207	GO:0009733
PGSC0003DMG400010207	GO:0009735
PGSC0003DMG400010207	GO:0016787
PGSC0003DMG400010207	GO:0008233
PGSC0003DMG400010207	GO:0006508
PGSC0003DMG400010207	GO:0005615
PGSC0003DMG400010207	GO:0004197
PGSC0003DMG400010207	GO:0051603
PGSC0003DMG400010207	GO:0005764
PGSC0003DMG400030150	GO:0016021
PGSC0003DMG400030150	GO:0016020
PGSC0003DMG400030150	GO:0005515
PGSC0003DMG400014772	GO:0016740
PGSC0003DMG400014772	GO:0008080
PGSC0003DMG400020972	GO:0001510
PGSC0003DMG400020972	GO:0008168
PGSC0003DMG400020972	GO:0032259
PGSC0003DMG400020972	GO:0006364
PGSC0003DMG400020972	GO:0005634
PGSC0003DMG400020972	GO:0000453
PGSC0003DMG400020972	GO:0005730
PGSC0003DMG400020972	GO:0008649
PGSC0003DMG400020972	GO:0016740
PGSC0003DMG400020972	GO:0042254
PGSC0003DMG400020972	GO:0031167
PGSC0003DMG400020972	GO:0030687
PGSC0003DMG400020972	GO:0000463
PGSC0003DMG400020972	GO:0008173
PGSC0003DMG400020972	GO:0008650
PGSC0003DMG400020972	GO:0016435
PGSC0003DMG400020972	GO:0000466
PGSC0003DMG400022492	GO:0016787
PGSC0003DMG400024281	GO:0030170
PGSC0003DMG400024281	GO:0008483
PGSC0003DMG400024281	GO:0003824
PGSC0003DMG400003042	GO:0005576
PGSC0003DMG400003042	GO:0006952
PGSC0003DMG400019578	GO:0016020
PGSC0003DMG400019578	GO:0016021
PGSC0003DMG400019578	GO:0005886
PGSC0003DMG401025689	GO:0008171
PGSC0003DMG401025689	GO:0046983
PGSC0003DMG401025689	GO:0016740
PGSC0003DMG401025689	GO:0008168
PGSC0003DMG401025689	GO:0032259
PGSC0003DMG401025689	GO:0008757
PGSC0003DMG401025689	GO:0019438
PGSC0003DMG401027561	GO:0005515
PGSC0003DMG400018557	GO:0005856
PGSC0003DMG400018557	GO:0003779
PGSC0003DMG400018557	GO:0005737
PGSC0003DMG400018557	GO:0003785
PGSC0003DMG400018557	GO:0042989
PGSC0003DMG400018557	GO:0005938
PGSC0003DMG400031403	GO:0016791
PGSC0003DMG400031403	GO:0016311
PGSC0003DMG400031403	GO:0003993
PGSC0003DMG400007565	GO:0016021
PGSC0003DMG400007565	GO:0005506
PGSC0003DMG400007565	GO:0016705
PGSC0003DMG400007565	GO:0004497
PGSC0003DMG400007565	GO:0020037
PGSC0003DMG400007565	GO:0016020
PGSC0003DMG400007565	GO:0016491
PGSC0003DMG400007565	GO:0046872
PGSC0003DMG400007565	GO:0055114
PGSC0003DMG400007565	GO:0016125
PGSC0003DMG400001272	GO:0005622
PGSC0003DMG400001272	GO:0005525
PGSC0003DMG400001272	GO:0000166
PGSC0003DMG400001272	GO:0006886
PGSC0003DMG400001272	GO:0016192
PGSC0003DMG402010991	GO:0016021
PGSC0003DMG402010991	GO:0005506
PGSC0003DMG402010991	GO:0016705
PGSC0003DMG402010991	GO:0004497
PGSC0003DMG402010991	GO:0020037
PGSC0003DMG402010991	GO:0016020
PGSC0003DMG402010991	GO:0016491
PGSC0003DMG402010991	GO:0046872
PGSC0003DMG402010991	GO:0055114
PGSC0003DMG400001529	GO:0004568
PGSC0003DMG400001529	GO:0016998
PGSC0003DMG400001529	GO:0006032
PGSC0003DMG400001529	GO:0005975
PGSC0003DMG400001529	GO:0050832
PGSC0003DMG400040160	GO:0003676
PGSC0003DMG400040160	GO:0008270
PGSC0003DMG400025645	GO:0005743
PGSC0003DMG400025645	GO:0061617
PGSC0003DMG400025645	GO:0016020
PGSC0003DMG400025645	GO:0016021
PGSC0003DMG400025645	GO:0005739
PGSC0003DMG400030809	GO:0005615
PGSC0003DMG400004342	GO:0008171
PGSC0003DMG400004342	GO:0016740
PGSC0003DMG400004342	GO:0008168
PGSC0003DMG400004342	GO:0032259
PGSC0003DMG400004342	GO:0008757
PGSC0003DMG400004342	GO:0019438
PGSC0003DMG400011953	GO:0008289
PGSC0003DMG400011953	GO:0006869
PGSC0003DMG400011953	GO:0016020
PGSC0003DMG402002685	GO:0006470
PGSC0003DMG402002685	GO:0004721
PGSC0003DMG400015523	GO:0016798
PGSC0003DMG400015523	GO:0004553
PGSC0003DMG400015523	GO:0005975
PGSC0003DMG400015523	GO:0016787
PGSC0003DMG400015523	GO:0008152
PGSC0003DMG401000586	GO:0004252
PGSC0003DMG401000586	GO:0006508
PGSC0003DMG400009414	GO:0004252
PGSC0003DMG400009414	GO:0016787
PGSC0003DMG400009414	GO:0008233
PGSC0003DMG400009414	GO:0006508
PGSC0003DMG400009414	GO:0008236
PGSC0003DMG400018024	GO:0016021
PGSC0003DMG400018024	GO:0005524
PGSC0003DMG400018024	GO:0004672
PGSC0003DMG400018024	GO:0006468
PGSC0003DMG400018024	GO:0016020
PGSC0003DMG400018024	GO:0005515
PGSC0003DMG400018024	GO:0005886
PGSC0003DMG400018024	GO:0009755
PGSC0003DMG400002167	GO:0009607
PGSC0003DMG400002167	GO:0016740
PGSC0003DMG400002167	GO:0006952
PGSC0003DMG400002167	GO:0006749
PGSC0003DMG400002167	GO:0004364
PGSC0003DMG400002167	GO:0005515
PGSC0003DMG400002167	GO:0005737
PGSC0003DMG400030462	GO:0016021
PGSC0003DMG400030462	GO:0016310
PGSC0003DMG400030462	GO:0004674
PGSC0003DMG400030462	GO:0043066
PGSC0003DMG400030462	GO:0005524
PGSC0003DMG400030462	GO:0007165
PGSC0003DMG400030462	GO:0016740
PGSC0003DMG400030462	GO:0000166
PGSC0003DMG400030462	GO:0004672
PGSC0003DMG400030462	GO:0016301
PGSC0003DMG400030462	GO:0006468
PGSC0003DMG400030462	GO:0016020
PGSC0003DMG400030462	GO:0106310
PGSC0003DMG400030462	GO:0106311
PGSC0003DMG400010519	GO:0016310
PGSC0003DMG400010519	GO:0006629
PGSC0003DMG400010519	GO:0008374
PGSC0003DMG400010519	GO:0016740
PGSC0003DMG400010519	GO:0000166
PGSC0003DMG400010519	GO:0004672
PGSC0003DMG400010519	GO:0004674
PGSC0003DMG400010519	GO:0005524
PGSC0003DMG400010519	GO:0016301
PGSC0003DMG400010519	GO:0006468
PGSC0003DMG400010519	GO:0051233
PGSC0003DMG400010519	GO:0035174
PGSC0003DMG400010519	GO:0007052
PGSC0003DMG400010519	GO:0032465
PGSC0003DMG400010519	GO:0035404
PGSC0003DMG400010519	GO:0005876
PGSC0003DMG400010519	GO:0032133
PGSC0003DMG400010519	GO:0000779
PGSC0003DMG400010519	GO:0106310
PGSC0003DMG400010519	GO:0106311
PGSC0003DMG400022744	GO:0005506
PGSC0003DMG400022744	GO:0016705
PGSC0003DMG400022744	GO:0004497
PGSC0003DMG400022744	GO:0020037
PGSC0003DMG400022744	GO:0016491
PGSC0003DMG400022744	GO:0046872
PGSC0003DMG400022744	GO:0055114
PGSC0003DMG401007406	GO:0102965
PGSC0003DMG401007406	GO:0006629
PGSC0003DMG401007406	GO:0080019
PGSC0003DMG401007406	GO:0016491
PGSC0003DMG401007406	GO:0055114
PGSC0003DMG401007406	GO:0043231
PGSC0003DMG401007406	GO:0010345
PGSC0003DMG401007406	GO:0035336
PGSC0003DMG402006826	GO:0016491
PGSC0003DMG402006826	GO:0055114
PGSC0003DMG402015339	GO:0009639
PGSC0003DMG402015339	GO:0009959
PGSC0003DMG400030382	GO:0005576
PGSC0003DMG400030382	GO:0006979
PGSC0003DMG400030382	GO:0004601
PGSC0003DMG400030382	GO:0046872
PGSC0003DMG400030382	GO:0020037
PGSC0003DMG400030382	GO:0042744
PGSC0003DMG400030382	GO:0016491
PGSC0003DMG400030382	GO:0055114
PGSC0003DMG400030382	GO:0098869
PGSC0003DMG400015327	GO:0016758
PGSC0003DMG400015327	GO:0016740
PGSC0003DMG400015327	GO:0016757
PGSC0003DMG400015327	GO:0008194
PGSC0003DMG400015327	GO:0016021
PGSC0003DMG400015327	GO:0016020
PGSC0003DMG402017239	GO:0031418
PGSC0003DMG402017239	GO:0046872
PGSC0003DMG402017239	GO:0016491
PGSC0003DMG402017239	GO:0055114
PGSC0003DMG400009514	GO:0010466
PGSC0003DMG400009514	GO:0030414
PGSC0003DMG400009514	GO:0010951
PGSC0003DMG400009514	GO:0004866
PGSC0003DMG400032272	GO:0016747
PGSC0003DMG400032272	GO:0016740
PGSC0003DMG400032272	GO:0008080
PGSC0003DMG400023234	GO:0006952
PGSC0003DMG400014836	GO:0016020
PGSC0003DMG400014836	GO:0012505
PGSC0003DMG400021216	GO:0050660
PGSC0003DMG400015769	GO:0006629
PGSC0003DMG400015769	GO:0016042
PGSC0003DMG400015769	GO:0016787
PGSC0003DMG400015769	GO:0005773
PGSC0003DMG400015769	GO:0045735
PGSC0003DMG400015769	GO:0006952
PGSC0003DMG400015769	GO:0004620
PGSC0003DMG400015769	GO:0047372
PGSC0003DMG401025083	GO:0006979
PGSC0003DMG401025083	GO:0004601
PGSC0003DMG401025083	GO:0020037
PGSC0003DMG401025083	GO:0046872
PGSC0003DMG401025083	GO:0055114
PGSC0003DMG401025083	GO:0098869
PGSC0003DMG401025083	GO:0005576
PGSC0003DMG401025083	GO:0042744
PGSC0003DMG401025083	GO:0016491
PGSC0003DMG401025083	GO:0009506
PGSC0003DMG401025083	GO:0009505
PGSC0003DMG400014345	GO:0016207
PGSC0003DMG400014345	GO:0003824
PGSC0003DMG400014345	GO:0009698
PGSC0003DMG400014345	GO:0006631
PGSC0003DMG400014345	GO:0031956
PGSC0003DMG400026481	GO:0016310
PGSC0003DMG400026481	GO:0047325
PGSC0003DMG400026481	GO:0005622
PGSC0003DMG400026481	GO:0005524
PGSC0003DMG400026481	GO:0032957
PGSC0003DMG400026481	GO:0052725
PGSC0003DMG400026481	GO:0052726
PGSC0003DMG400026481	GO:0000287
PGSC0003DMG400026481	GO:0016740
PGSC0003DMG400026481	GO:0000166
PGSC0003DMG400026481	GO:0016301
PGSC0003DMG400026481	GO:0046872
PGSC0003DMG400026481	GO:0005737
PGSC0003DMG400026481	GO:0005829
PGSC0003DMG400026481	GO:0052746
PGSC0003DMG400006840	GO:0004252
PGSC0003DMG400006840	GO:0016787
PGSC0003DMG400006840	GO:0008233
PGSC0003DMG400006840	GO:0006508
PGSC0003DMG400006840	GO:0008236
PGSC0003DMG400010136	GO:0010466
PGSC0003DMG400010136	GO:0030414
PGSC0003DMG400010136	GO:0010951
PGSC0003DMG400010136	GO:0004866
PGSC0003DMG400027914	GO:0005576
PGSC0003DMG400027914	GO:0005507
PGSC0003DMG400027914	GO:0016491
PGSC0003DMG400027914	GO:0046872
PGSC0003DMG400027914	GO:0055114
PGSC0003DMG400027914	GO:0008447
PGSC0003DMG400003912	GO:0004252
PGSC0003DMG400003912	GO:0016787
PGSC0003DMG400003912	GO:0008233
PGSC0003DMG400003912	GO:0006508
PGSC0003DMG400003912	GO:0008236
PGSC0003DMG400016493	GO:0016021
PGSC0003DMG400016493	GO:0016020
PGSC0003DMG400002427	GO:0043531
PGSC0003DMG400002427	GO:0007165
PGSC0003DMG400002427	GO:0006952
PGSC0003DMG400002427	GO:0016787
PGSC0003DMG400002427	GO:0005515
PGSC0003DMG400002427	GO:0050135
PGSC0003DMG400002427	GO:0061809
PGSC0003DMG400027736	GO:0003677
PGSC0003DMG400027736	GO:0046982
PGSC0003DMG400027736	GO:0000786
PGSC0003DMG400027736	GO:0006334
PGSC0003DMG400027736	GO:0005634
PGSC0003DMG400027736	GO:0005694
PGSC0003DMG400016812	GO:0009723
PGSC0003DMG400016812	GO:0003700
PGSC0003DMG400016812	GO:0006355
PGSC0003DMG400016812	GO:0006351
PGSC0003DMG400016812	GO:0008219
PGSC0003DMG400016812	GO:0051707
PGSC0003DMG400016812	GO:0005886
PGSC0003DMG400016812	GO:0009753
PGSC0003DMG400016812	GO:0043565
PGSC0003DMG400016812	GO:0045893
PGSC0003DMG400016812	GO:0005634
PGSC0003DMG400016812	GO:0005737
PGSC0003DMG400016812	GO:0010286
PGSC0003DMG400016812	GO:0009735
PGSC0003DMG400016812	GO:0003677
PGSC0003DMG400016812	GO:0006952
PGSC0003DMG401030815	GO:0008270
PGSC0003DMG401030815	GO:0016491
PGSC0003DMG401030815	GO:0046872
PGSC0003DMG401030815	GO:0055114
PGSC0003DMG401030815	GO:0005829
PGSC0003DMG401030815	GO:0004024
PGSC0003DMG401030815	GO:0051903
PGSC0003DMG401030815	GO:0046294
PGSC0003DMG402019589	GO:0016021
PGSC0003DMG402019589	GO:0016020
PGSC0003DMG400017955	GO:0016021
PGSC0003DMG400017955	GO:0055085
PGSC0003DMG400017955	GO:0009734
PGSC0003DMG400017955	GO:0016020
PGSC0003DMG400017955	GO:0005886
PGSC0003DMG400017955	GO:0005783
PGSC0003DMG400017955	GO:0009926
PGSC0003DMG400017955	GO:0010329
PGSC0003DMG400017955	GO:0010252
PGSC0003DMG400017955	GO:0010315
PGSC0003DMG400020829	GO:0016021
PGSC0003DMG400020829	GO:0006811
PGSC0003DMG400020829	GO:0005375
PGSC0003DMG400020829	GO:0016020
PGSC0003DMG400020829	GO:0035434
PGSC0003DMG400020829	GO:0006825
PGSC0003DMG400020829	GO:0006878
PGSC0003DMG400020829	GO:0005886
PGSC0003DMG400018133	GO:0005506
PGSC0003DMG400018133	GO:0016705
PGSC0003DMG400018133	GO:0004497
PGSC0003DMG400018133	GO:0020037
PGSC0003DMG400018133	GO:0016491
PGSC0003DMG400018133	GO:0046872
PGSC0003DMG400018133	GO:0055114
PGSC0003DMG400025932	GO:0005515
PGSC0003DMG400014550	GO:0003677
PGSC0003DMG400014550	GO:0005634
PGSC0003DMG400014550	GO:0043565
PGSC0003DMG400014550	GO:0006355
PGSC0003DMG400024754	GO:0016021
PGSC0003DMG400024754	GO:0005509
PGSC0003DMG400024754	GO:0050664
PGSC0003DMG400024754	GO:0004601
PGSC0003DMG400024754	GO:0009408
PGSC0003DMG400024754	GO:0016174
PGSC0003DMG400024754	GO:0009845
PGSC0003DMG400024754	GO:0016020
PGSC0003DMG400024754	GO:0016491
PGSC0003DMG400024754	GO:0046872
PGSC0003DMG400024754	GO:0055114
PGSC0003DMG400024754	GO:0005886
PGSC0003DMG400024754	GO:0098869
PGSC0003DMG400005950	GO:0010466
PGSC0003DMG400005950	GO:0030414
PGSC0003DMG400005950	GO:0010951
PGSC0003DMG400005950	GO:0004869
PGSC0003DMG400020605	GO:0016021
PGSC0003DMG400020605	GO:0006952
PGSC0003DMG400020605	GO:0009607
PGSC0003DMG400020605	GO:0016020
PGSC0003DMG400008137	GO:0016758
PGSC0003DMG400008137	GO:0016740
PGSC0003DMG400008137	GO:0016757
PGSC0003DMG400008137	GO:0008194
PGSC0003DMG400028412	GO:0016021
PGSC0003DMG400028412	GO:0016020
PGSC0003DMG400008391	GO:0003700
PGSC0003DMG400008391	GO:0006355
PGSC0003DMG400008391	GO:0043565
PGSC0003DMG400008391	GO:0005634
PGSC0003DMG400008391	GO:0003677
PGSC0003DMG400026899	GO:0010466
PGSC0003DMG400026899	GO:0030414
PGSC0003DMG400026899	GO:0010951
PGSC0003DMG400026899	GO:0004869
PGSC0003DMG400005542	GO:0016021
PGSC0003DMG400005542	GO:0016020
PGSC0003DMG400005542	GO:0005886
PGSC0003DMG400005542	GO:0005515
PGSC0003DMG400006890	GO:0016021
PGSC0003DMG400006890	GO:0016020
PGSC0003DMG400021806	GO:0003677
PGSC0003DMG400021806	GO:0046982
PGSC0003DMG400021806	GO:0000786
PGSC0003DMG400021806	GO:0005634
PGSC0003DMG400021806	GO:0005694
PGSC0003DMG400021806	GO:0006342
PGSC0003DMG400021806	GO:0000785
PGSC0003DMG400010809	GO:0004857
PGSC0003DMG400010809	GO:0043086
PGSC0003DMG400010809	GO:0016787
PGSC0003DMG400010809	GO:0071555
PGSC0003DMG400010809	GO:0005576
PGSC0003DMG402000586	GO:0004252
PGSC0003DMG402000586	GO:0006508
PGSC0003DMG402000586	GO:0008236
PGSC0003DMG400003531	GO:0009415
PGSC0003DMG400003531	GO:0005829
PGSC0003DMG400003531	GO:0009414
PGSC0003DMG400003531	GO:0009737
PGSC0003DMG400003531	GO:0009631
PGSC0003DMG400003739	GO:0016021
PGSC0003DMG400003739	GO:0016020
PGSC0003DMG400028245	GO:0016491
PGSC0003DMG400028245	GO:0055114
PGSC0003DMG400002047	GO:0003680
PGSC0003DMG400002047	GO:0003700
PGSC0003DMG400002047	GO:0006351
PGSC0003DMG400002047	GO:0005634
PGSC0003DMG400002047	GO:0003677
PGSC0003DMG400002047	GO:0006355
PGSC0003DMG400024082	GO:0003824
PGSC0003DMG402027687	GO:0004180
PGSC0003DMG402027687	GO:0004185
PGSC0003DMG402027687	GO:0016787
PGSC0003DMG402027687	GO:0008233
PGSC0003DMG402027687	GO:0006508
PGSC0003DMG402027687	GO:0005576
PGSC0003DMG402027687	GO:0016747
PGSC0003DMG402027687	GO:0019748
PGSC0003DMG400000493	GO:0016829
PGSC0003DMG400000493	GO:0004089
PGSC0003DMG400000493	GO:0015976
PGSC0003DMG400000493	GO:0008270
PGSC0003DMG400010369	GO:0016021
PGSC0003DMG400010369	GO:0046873
PGSC0003DMG400010369	GO:0030001
PGSC0003DMG400010369	GO:0016020
PGSC0003DMG400010369	GO:0055085
PGSC0003DMG400010369	GO:0005886
PGSC0003DMG400010369	GO:0005385
PGSC0003DMG400010369	GO:0071577
PGSC0003DMG400005683	GO:0010466
PGSC0003DMG400005683	GO:0030414
PGSC0003DMG400005683	GO:0010951
PGSC0003DMG400005683	GO:0004869
PGSC0003DMG400020189	GO:0090305
PGSC0003DMG400020189	GO:0006281
PGSC0003DMG400020189	GO:0005634
PGSC0003DMG400020189	GO:0006303
PGSC0003DMG400020189	GO:0003684
PGSC0003DMG400020189	GO:0035312
PGSC0003DMG400020189	GO:0031848
PGSC0003DMG400020189	GO:0036297
PGSC0003DMG400014200	GO:0016020
PGSC0003DMG400014200	GO:0005886
PGSC0003DMG400014200	GO:0005901
PGSC0003DMG400014200	GO:0072659
PGSC0003DMG400014200	GO:0044853
PGSC0003DMG400011708	GO:0016021
PGSC0003DMG400011708	GO:0016020
PGSC0003DMG400011708	GO:0005515
PGSC0003DMG400009705	GO:0016021
PGSC0003DMG400009705	GO:0005215
PGSC0003DMG400009705	GO:0016020
PGSC0003DMG400009705	GO:0015211
PGSC0003DMG400009705	GO:0015860
PGSC0003DMG400014540	GO:0016798
PGSC0003DMG400014540	GO:0004558
PGSC0003DMG400014540	GO:0032450
PGSC0003DMG400014540	GO:0000023
PGSC0003DMG400014540	GO:0030246
PGSC0003DMG400014540	GO:0090599
PGSC0003DMG400014540	GO:0003824
PGSC0003DMG400014540	GO:0004553
PGSC0003DMG400014540	GO:0005975
PGSC0003DMG400014540	GO:0016787
PGSC0003DMG400014540	GO:0008152
PGSC0003DMG400032510	GO:0005576
PGSC0003DMG400032510	GO:0005507
PGSC0003DMG400032510	GO:0016491
PGSC0003DMG400032510	GO:0046872
PGSC0003DMG400032510	GO:0055114
PGSC0003DMG400032510	GO:0009506
PGSC0003DMG400032510	GO:0008447
PGSC0003DMG400012536	GO:0016021
PGSC0003DMG400012536	GO:0016020
PGSC0003DMG400019944	GO:0016021
PGSC0003DMG400019944	GO:0016020
PGSC0003DMG400018916	GO:0004097
PGSC0003DMG400018916	GO:0046148
PGSC0003DMG400018916	GO:0046872
PGSC0003DMG400018916	GO:0016491
PGSC0003DMG400018916	GO:0055114
PGSC0003DMG400018916	GO:0009579
PGSC0003DMG400018916	GO:0009543
PGSC0003DMG401028122	GO:0000387
PGSC0003DMG401028122	GO:0005732
PGSC0003DMG401028122	GO:0005681
PGSC0003DMG401028122	GO:0003723
PGSC0003DMG401028122	GO:0005634
PGSC0003DMG401028122	GO:0006397
PGSC0003DMG401028122	GO:0008380
PGSC0003DMG401028122	GO:0000398
PGSC0003DMG401028122	GO:0005685
PGSC0003DMG401028122	GO:0071013
PGSC0003DMG400008523	GO:0016021
PGSC0003DMG400008523	GO:0005524
PGSC0003DMG400008523	GO:0048544
PGSC0003DMG400008523	GO:0004672
PGSC0003DMG400008523	GO:0006468
PGSC0003DMG400008523	GO:0016020
PGSC0003DMG400008523	GO:0016310
PGSC0003DMG400008523	GO:0004674
PGSC0003DMG400008523	GO:0016740
PGSC0003DMG400008523	GO:0000166
PGSC0003DMG400008523	GO:0016301
PGSC0003DMG400008523	GO:0046777
PGSC0003DMG400008523	GO:0005886
PGSC0003DMG400008523	GO:0106310
PGSC0003DMG400008523	GO:0106311
PGSC0003DMG400019712	GO:0005524
PGSC0003DMG400019712	GO:0004672
PGSC0003DMG400019712	GO:0006468
PGSC0003DMG400004712	GO:0008375
PGSC0003DMG400025487	GO:0009514
PGSC0003DMG400025487	GO:0016829
PGSC0003DMG400025487	GO:0006099
PGSC0003DMG400025487	GO:0003824
PGSC0003DMG400025487	GO:0019752
PGSC0003DMG400025487	GO:0004451
PGSC0003DMG400025487	GO:0046872
PGSC0003DMG400025487	GO:0005777
PGSC0003DMG400025487	GO:0006097
PGSC0003DMG400002582	GO:0003676
PGSC0003DMG400002582	GO:0003723
PGSC0003DMG400002582	GO:0003729
PGSC0003DMG400017936	GO:0005739
PGSC0003DMG400013548	GO:0016021
PGSC0003DMG400013548	GO:0016020
PGSC0003DMG403015682	GO:0005515
PGSC0003DMG400039685	GO:0005506
PGSC0003DMG400039685	GO:0016705
PGSC0003DMG400039685	GO:0004497
PGSC0003DMG400039685	GO:0020037
PGSC0003DMG400039685	GO:0016491
PGSC0003DMG400039685	GO:0046872
PGSC0003DMG400039685	GO:0055114
PGSC0003DMG400008381	GO:0016021
PGSC0003DMG400008381	GO:0016020
PGSC0003DMG400008381	GO:0031225
PGSC0003DMG400015219	GO:0010466
PGSC0003DMG400015219	GO:0030414
PGSC0003DMG400015219	GO:0010951
PGSC0003DMG400015219	GO:0004866
PGSC0003DMG403005679	GO:0005506
PGSC0003DMG403005679	GO:0016705
PGSC0003DMG403005679	GO:0004497
PGSC0003DMG403005679	GO:0020037
PGSC0003DMG403005679	GO:0016491
PGSC0003DMG403005679	GO:0046872
PGSC0003DMG403005679	GO:0055114
PGSC0003DMG400020375	GO:0016787
PGSC0003DMG400020375	GO:0046856
PGSC0003DMG400020375	GO:0005515
PGSC0003DMG400020375	GO:0004439
PGSC0003DMG400020375	GO:0046855
PGSC0003DMG400011891	GO:0003677
PGSC0003DMG400011891	GO:0006355
PGSC0003DMG400011891	GO:0005634
PGSC0003DMG400031457	GO:0006559
PGSC0003DMG400031457	GO:0016829
PGSC0003DMG400031457	GO:0009800
PGSC0003DMG400031457	GO:0003824
PGSC0003DMG400031457	GO:0016841
PGSC0003DMG400031457	GO:0005737
PGSC0003DMG400031457	GO:0045548
PGSC0003DMG400031457	GO:0009698
PGSC0003DMG400002366	GO:0005515
PGSC0003DMG400012947	GO:0005506
PGSC0003DMG400012947	GO:0016705
PGSC0003DMG400012947	GO:0004497
PGSC0003DMG400012947	GO:0020037
PGSC0003DMG400012947	GO:0016491
PGSC0003DMG400012947	GO:0046872
PGSC0003DMG400012947	GO:0055114
PGSC0003DMG400013460	GO:0016168
PGSC0003DMG400013460	GO:0009765
PGSC0003DMG400013460	GO:0009523
PGSC0003DMG400013460	GO:0018298
PGSC0003DMG400013460	GO:0009522
PGSC0003DMG400013460	GO:0009535
PGSC0003DMG400013460	GO:0009507
PGSC0003DMG400013460	GO:0009536
PGSC0003DMG400013460	GO:0015979
PGSC0003DMG400013460	GO:0016020
PGSC0003DMG400013460	GO:0009579
PGSC0003DMG400013460	GO:0016021
PGSC0003DMG400013460	GO:0009416
PGSC0003DMG400013460	GO:0009941
PGSC0003DMG400013460	GO:0009768
PGSC0003DMG400013460	GO:0010287
PGSC0003DMG400012315	GO:0016021
PGSC0003DMG400012315	GO:0016020
PGSC0003DMG401022140	GO:0016021
PGSC0003DMG401022140	GO:0045040
PGSC0003DMG401022140	GO:0005742
PGSC0003DMG401022140	GO:0016020
PGSC0003DMG401022140	GO:0005741
PGSC0003DMG401022140	GO:0005515
PGSC0003DMG400014982	GO:0016021
PGSC0003DMG400014982	GO:0016020
PGSC0003DMG400017250	GO:0016758
PGSC0003DMG400017250	GO:0016740
PGSC0003DMG400017250	GO:0016757
PGSC0003DMG400017250	GO:0008194
PGSC0003DMG400011406	GO:0005623
PGSC0003DMG400011406	GO:0016021
PGSC0003DMG400011406	GO:0015035
PGSC0003DMG400011406	GO:0009055
PGSC0003DMG400011406	GO:0045454
PGSC0003DMG400011406	GO:0016020
PGSC0003DMG400011406	GO:0055114
PGSC0003DMG400011406	GO:0005737
PGSC0003DMG400011406	GO:0005634
PGSC0003DMG400030503	GO:0005886
PGSC0003DMG400013266	GO:0016491
PGSC0003DMG400013266	GO:0055114
PGSC0003DMG400002581	GO:0050661
PGSC0003DMG400002581	GO:0051287
PGSC0003DMG400002581	GO:0016491
PGSC0003DMG400002581	GO:0055114
PGSC0003DMG400002581	GO:0009507
PGSC0003DMG400002581	GO:0016616
PGSC0003DMG400002581	GO:0030267
PGSC0003DMG400006455	GO:0016021
PGSC0003DMG400006455	GO:0016020
PGSC0003DMG400008427	GO:0016021
PGSC0003DMG400008427	GO:0016020
PGSC0003DMG400021887	GO:0043531
PGSC0003DMG400021887	GO:0007165
PGSC0003DMG400021887	GO:0006952
PGSC0003DMG400021887	GO:0016787
PGSC0003DMG400021887	GO:0005515
PGSC0003DMG400021887	GO:0050135
PGSC0003DMG400021887	GO:0061809
PGSC0003DMG401011095	GO:0016765
PGSC0003DMG401011095	GO:0016740
PGSC0003DMG401011095	GO:0009570
PGSC0003DMG401011095	GO:0005783
PGSC0003DMG401011095	GO:0002094
PGSC0003DMG401011095	GO:0016094
PGSC0003DMG401011095	GO:0045547
PGSC0003DMG401011095	GO:0009409
PGSC0003DMG401011095	GO:0009668
PGSC0003DMG400017997	GO:0005506
PGSC0003DMG400017997	GO:0016705
PGSC0003DMG400017997	GO:0004497
PGSC0003DMG400017997	GO:0020037
PGSC0003DMG400017997	GO:0016491
PGSC0003DMG400017997	GO:0046872
PGSC0003DMG400017997	GO:0055114
PGSC0003DMG400007908	GO:0016758
PGSC0003DMG400007908	GO:0016740
PGSC0003DMG400007908	GO:0008194
PGSC0003DMG400007908	GO:0016757
PGSC0003DMG400013045	GO:0016021
PGSC0003DMG400013045	GO:0016020
PGSC0003DMG400024771	GO:0005515
PGSC0003DMG400031091	GO:0006749
PGSC0003DMG400031091	GO:0005515
PGSC0003DMG400031091	GO:0005737
PGSC0003DMG400031091	GO:0004364
PGSC0003DMG400016616	GO:0005506
PGSC0003DMG400016616	GO:0016705
PGSC0003DMG400016616	GO:0004497
PGSC0003DMG400016616	GO:0020037
PGSC0003DMG400016616	GO:0016491
PGSC0003DMG400016616	GO:0046872
PGSC0003DMG400016616	GO:0055114
PGSC0003DMG400015132	GO:0006952
PGSC0003DMG402015792	GO:0055114
PGSC0003DMG400004369	GO:0003755
PGSC0003DMG400004369	GO:0003676
PGSC0003DMG400004369	GO:0003723
PGSC0003DMG400004369	GO:0016853
PGSC0003DMG400004369	GO:0000413
PGSC0003DMG400006639	GO:0016310
PGSC0003DMG400006639	GO:0004674
PGSC0003DMG400006639	GO:0005524
PGSC0003DMG400006639	GO:0016740
PGSC0003DMG400006639	GO:0000166
PGSC0003DMG400006639	GO:0004672
PGSC0003DMG400006639	GO:0016301
PGSC0003DMG400006639	GO:0006468
PGSC0003DMG400006639	GO:0005634
PGSC0003DMG400006639	GO:0005737
PGSC0003DMG400006639	GO:0005886
PGSC0003DMG400006945	GO:0006629
PGSC0003DMG400006945	GO:0016787
PGSC0003DMG400006945	GO:0005634
PGSC0003DMG400014064	GO:0005524
PGSC0003DMG400014064	GO:0004672
PGSC0003DMG400014064	GO:0006468
PGSC0003DMG401001494	GO:0004864
PGSC0003DMG401001494	GO:0006952
PGSC0003DMG401001494	GO:0009607
PGSC0003DMG401001494	GO:0032515
PGSC0003DMG401001494	GO:0038023
PGSC0003DMG401001494	GO:0010427
PGSC0003DMG401001494	GO:0009738
PGSC0003DMG401001494	GO:0005634
PGSC0003DMG401001494	GO:0005737
PGSC0003DMG401001494	GO:0080163
PGSC0003DMG400024344	GO:0016758
PGSC0003DMG400024344	GO:0016740
PGSC0003DMG400024344	GO:0016757
PGSC0003DMG400024344	GO:0008194
PGSC0003DMG400013702	GO:0004615
PGSC0003DMG400013702	GO:0009298
PGSC0003DMG400013702	GO:0005737
PGSC0003DMG400013702	GO:0016853
PGSC0003DMG400013702	GO:0005829
PGSC0003DMG400013702	GO:0045047
PGSC0003DMG400013702	GO:0006487
PGSC0003DMG400013702	GO:0006013
PGSC0003DMG400023833	GO:0016021
PGSC0003DMG400023833	GO:0006629
PGSC0003DMG400023833	GO:0016717
PGSC0003DMG400023833	GO:0016020
PGSC0003DMG400023833	GO:0055114
PGSC0003DMG400015130	GO:0006952
PGSC0003DMG400015130	GO:0031640
PGSC0003DMG400015130	GO:0008233
PGSC0003DMG400015130	GO:0005576
PGSC0003DMG400015130	GO:0050832
PGSC0003DMG400013684	GO:0005506
PGSC0003DMG400013684	GO:0016705
PGSC0003DMG400013684	GO:0004497
PGSC0003DMG400013684	GO:0020037
PGSC0003DMG400013684	GO:0016491
PGSC0003DMG400013684	GO:0046872
PGSC0003DMG400013684	GO:0055114
PGSC0003DMG400020515	GO:0019464
PGSC0003DMG400020515	GO:0005960
PGSC0003DMG400020515	GO:0005739
PGSC0003DMG400020515	GO:0005737
PGSC0003DMG400020515	GO:0009249
PGSC0003DMG400024997	GO:0005737
PGSC0003DMG400024997	GO:0016881
PGSC0003DMG400024997	GO:0010279
PGSC0003DMG400021791	GO:0005515
PGSC0003DMG400021791	GO:0005634
PGSC0003DMG400021791	GO:0005737
PGSC0003DMG400021791	GO:0031386
PGSC0003DMG400021791	GO:0016567
PGSC0003DMG400021791	GO:0031625
PGSC0003DMG400021791	GO:0019941
PGSC0003DMG400020343	GO:0016747
PGSC0003DMG400022853	GO:0016021
PGSC0003DMG400022853	GO:0016020
PGSC0003DMG400022853	GO:0008270
PGSC0003DMG400011012	GO:0006749
PGSC0003DMG400011012	GO:0005515
PGSC0003DMG400011012	GO:0005737
PGSC0003DMG400011012	GO:0004364
PGSC0003DMG400016357	GO:0016021
PGSC0003DMG400016357	GO:0016020
PGSC0003DMG400016357	GO:0005515
PGSC0003DMG400031756	GO:0006464
PGSC0003DMG400031756	GO:0033819
PGSC0003DMG400031756	GO:0009249
PGSC0003DMG400031756	GO:0016740
PGSC0003DMG400031756	GO:0016746
PGSC0003DMG400031756	GO:0005739
PGSC0003DMG400031756	GO:0016415
PGSC0003DMG400031756	GO:0102555
PGSC0003DMG400031756	GO:0018215
PGSC0003DMG400031399	GO:0016021
PGSC0003DMG400031399	GO:0006012
PGSC0003DMG400031399	GO:0003978
PGSC0003DMG400031399	GO:0016020
PGSC0003DMG400031399	GO:0016853
PGSC0003DMG400031399	GO:0005975
PGSC0003DMG400031399	GO:0003824
PGSC0003DMG400031399	GO:0050662
PGSC0003DMG401006826	GO:0051537
PGSC0003DMG401006826	GO:0009055
PGSC0003DMG401006826	GO:0051536
PGSC0003DMG401006826	GO:0046872
PGSC0003DMG401006826	GO:0071949
PGSC0003DMG401006826	GO:0009507
PGSC0003DMG401006826	GO:0016491
PGSC0003DMG401006826	GO:0055114
PGSC0003DMG401006826	GO:0050660
PGSC0003DMG401006826	GO:0022900
PGSC0003DMG401020126	GO:0005515
PGSC0003DMG400026594	GO:0016021
PGSC0003DMG400026594	GO:0005506
PGSC0003DMG400026594	GO:0016705
PGSC0003DMG400026594	GO:0004497
PGSC0003DMG400026594	GO:0020037
PGSC0003DMG400026594	GO:0016020
PGSC0003DMG400026594	GO:0016491
PGSC0003DMG400026594	GO:0046872
PGSC0003DMG400026594	GO:0055114
PGSC0003DMG400017184	GO:0016491
PGSC0003DMG400017184	GO:0055114
PGSC0003DMG400017184	GO:0046872
PGSC0003DMG400042445	GO:0004252
PGSC0003DMG400042445	GO:0016787
PGSC0003DMG400042445	GO:0008233
PGSC0003DMG400042445	GO:0006508
PGSC0003DMG400042445	GO:0008236
PGSC0003DMG400014774	GO:0016740
PGSC0003DMG400014774	GO:0008080
PGSC0003DMG400022818	GO:0016758
PGSC0003DMG400022818	GO:0016740
PGSC0003DMG400022818	GO:0008194
PGSC0003DMG400001937	GO:0106074
PGSC0003DMG400001937	GO:0051499
PGSC0003DMG400001937	GO:0016788
PGSC0003DMG400001937	GO:0019478
PGSC0003DMG400001937	GO:0046872
PGSC0003DMG400001937	GO:0016787
PGSC0003DMG400001937	GO:0005829
PGSC0003DMG400005284	GO:0003824
PGSC0003DMG400005284	GO:0003855
PGSC0003DMG400005284	GO:0004764
PGSC0003DMG400005284	GO:0055114
PGSC0003DMG400005284	GO:0008652
PGSC0003DMG400005284	GO:0009073
PGSC0003DMG400005284	GO:0009423
PGSC0003DMG400005284	GO:0019632
PGSC0003DMG400000919	GO:0016021
PGSC0003DMG400000919	GO:0022857
PGSC0003DMG400000919	GO:0016020
PGSC0003DMG400000919	GO:0055085
PGSC0003DMG400000919	GO:0005886
PGSC0003DMG400003507	GO:0016021
PGSC0003DMG400003507	GO:0016192
PGSC0003DMG400003507	GO:0016020
PGSC0003DMG400003507	GO:0006886
PGSC0003DMG400003507	GO:0005622
PGSC0003DMG402005942	GO:0016798
PGSC0003DMG402005942	GO:0004553
PGSC0003DMG402005942	GO:0005975
PGSC0003DMG402005942	GO:0016787
PGSC0003DMG402005942	GO:0008152
PGSC0003DMG402005942	GO:0005576
PGSC0003DMG402005942	GO:0008422
PGSC0003DMG402005942	GO:0009251
PGSC0003DMG400029129	GO:0030247
PGSC0003DMG400029128	GO:0005524
PGSC0003DMG400029128	GO:0004672
PGSC0003DMG400029128	GO:0006468
PGSC0003DMG400025027	GO:0098655
PGSC0003DMG400025027	GO:0016021
PGSC0003DMG400025027	GO:0005216
PGSC0003DMG400025027	GO:0016020
PGSC0003DMG400025027	GO:0055085
PGSC0003DMG400025027	GO:0006811
PGSC0003DMG400025027	GO:0034220
PGSC0003DMG400003357	GO:0046982
PGSC0003DMG400003357	GO:0005634
PGSC0003DMG400003357	GO:0006355
PGSC0003DMG400003357	GO:0001228
PGSC0003DMG400003357	GO:0045944
PGSC0003DMG400014275	GO:0016021
PGSC0003DMG400014275	GO:0008168
PGSC0003DMG400014275	GO:0016740
PGSC0003DMG400014275	GO:0016020
PGSC0003DMG400014275	GO:0032259
PGSC0003DMG400014275	GO:0005737
PGSC0003DMG400014275	GO:0005768
PGSC0003DMG400014275	GO:0005802
PGSC0003DMG400013680	GO:0005576
PGSC0003DMG400013680	GO:0045330
PGSC0003DMG400013680	GO:0005618
PGSC0003DMG400013680	GO:0030599
PGSC0003DMG400013680	GO:0004857
PGSC0003DMG400013680	GO:0009617
PGSC0003DMG400013680	GO:0042545
PGSC0003DMG400013680	GO:0045490
PGSC0003DMG400013680	GO:0043086
PGSC0003DMG400013680	GO:0016787
PGSC0003DMG400013680	GO:0071555
PGSC0003DMG400013680	GO:0046910
PGSC0003DMG400016695	GO:0016021
PGSC0003DMG400016695	GO:0016168
PGSC0003DMG400016695	GO:0009765
PGSC0003DMG400016695	GO:0009523
PGSC0003DMG400016695	GO:0018298
PGSC0003DMG400016695	GO:0009522
PGSC0003DMG400016695	GO:0009535
PGSC0003DMG400016695	GO:0016020
PGSC0003DMG400016695	GO:0009507
PGSC0003DMG400016695	GO:0009536
PGSC0003DMG400016695	GO:0015979
PGSC0003DMG400016695	GO:0009579
PGSC0003DMG400016695	GO:0009416
PGSC0003DMG400016695	GO:0009941
PGSC0003DMG400016695	GO:0009768
PGSC0003DMG400016695	GO:0010287
PGSC0003DMG400006392	GO:0048364
PGSC0003DMG400006392	GO:0009630
PGSC0003DMG400006392	GO:0005886
PGSC0003DMG400006392	GO:0061630
PGSC0003DMG400006392	GO:0016567
PGSC0003DMG400018131	GO:0005506
PGSC0003DMG400018131	GO:0016705
PGSC0003DMG400018131	GO:0004497
PGSC0003DMG400018131	GO:0020037
PGSC0003DMG400018131	GO:0016491
PGSC0003DMG400018131	GO:0046872
PGSC0003DMG400018131	GO:0055114
PGSC0003DMG400021787	GO:0016758
PGSC0003DMG400021787	GO:0016740
PGSC0003DMG400021787	GO:0016757
PGSC0003DMG400021787	GO:0008194
PGSC0003DMG400021787	GO:0080043
PGSC0003DMG400021787	GO:0080044
PGSC0003DMG400029415	GO:0007165
PGSC0003DMG400029415	GO:0005515
PGSC0003DMG400029415	GO:0043531
PGSC0003DMG400029415	GO:0016787
PGSC0003DMG400029415	GO:0050135
PGSC0003DMG400029415	GO:0061809
PGSC0003DMG400040318	GO:0003700
PGSC0003DMG400040318	GO:0003677
PGSC0003DMG400040318	GO:0000160
PGSC0003DMG400040318	GO:0005634
PGSC0003DMG400008270	GO:0005743
PGSC0003DMG400008270	GO:0016021
PGSC0003DMG400008270	GO:0006850
PGSC0003DMG400008270	GO:0016020
PGSC0003DMG400008270	GO:0005739
PGSC0003DMG400008270	GO:0031305
PGSC0003DMG400008270	GO:0050833
PGSC0003DMG400000405	GO:0003677
PGSC0003DMG400000405	GO:0046982
PGSC0003DMG400000405	GO:0000786
PGSC0003DMG400000405	GO:0006334
PGSC0003DMG400000405	GO:0005634
PGSC0003DMG400000405	GO:0005694
PGSC0003DMG400020016	GO:0016310
PGSC0003DMG400020016	GO:0004674
PGSC0003DMG400020016	GO:0005524
PGSC0003DMG400020016	GO:0016740
PGSC0003DMG400020016	GO:0000166
PGSC0003DMG400020016	GO:0004672
PGSC0003DMG400020016	GO:0016301
PGSC0003DMG400020016	GO:0006468
PGSC0003DMG400003619	GO:0016021
PGSC0003DMG400003619	GO:0016620
PGSC0003DMG400003619	GO:0006081
PGSC0003DMG400003619	GO:0016020
PGSC0003DMG400003619	GO:0016491
PGSC0003DMG400003619	GO:0055114
PGSC0003DMG400003619	GO:0005783
PGSC0003DMG400003619	GO:0004028
PGSC0003DMG400019437	GO:0042742
PGSC0003DMG400019437	GO:0050832
PGSC0003DMG400029406	GO:0006006
PGSC0003DMG400029406	GO:0050661
PGSC0003DMG400029406	GO:0016620
PGSC0003DMG400029406	GO:0051287
PGSC0003DMG400029406	GO:0009507
PGSC0003DMG400029406	GO:0009536
PGSC0003DMG400029406	GO:0016491
PGSC0003DMG400029406	GO:0055114
PGSC0003DMG400029406	GO:0004365
PGSC0003DMG400020898	GO:0016310
PGSC0003DMG400020898	GO:0004674
PGSC0003DMG400020898	GO:0005524
PGSC0003DMG400020898	GO:0016740
PGSC0003DMG400020898	GO:0000166
PGSC0003DMG400020898	GO:0004672
PGSC0003DMG400020898	GO:0016301
PGSC0003DMG400020898	GO:0006468
PGSC0003DMG400000129	GO:0009733
PGSC0003DMG400002946	GO:0016758
PGSC0003DMG400002946	GO:0016740
PGSC0003DMG400002946	GO:0008194
PGSC0003DMG400033563	GO:0005515
PGSC0003DMG401030920	GO:0009055
PGSC0003DMG401030920	GO:0022900
PGSC0003DMG401030920	GO:0046658
PGSC0003DMG401024894	GO:0016021
PGSC0003DMG401024894	GO:0016020
PGSC0003DMG401024894	GO:0010256
PGSC0003DMG400008087	GO:0016021
PGSC0003DMG400008087	GO:0016020
PGSC0003DMG400011926	GO:0043531
PGSC0003DMG400011926	GO:0006952
PGSC0003DMG400010215	GO:0008234
PGSC0003DMG400010215	GO:0016787
PGSC0003DMG400010215	GO:0008233
PGSC0003DMG400010215	GO:0006508
PGSC0003DMG400010215	GO:0005615
PGSC0003DMG400010215	GO:0004197
PGSC0003DMG400010215	GO:0051603
PGSC0003DMG400010215	GO:0005764
PGSC0003DMG400019235	GO:0009505
PGSC0003DMG400019235	GO:0004553
PGSC0003DMG400019235	GO:0005975
PGSC0003DMG400019235	GO:0016787
PGSC0003DMG400019235	GO:0008422
PGSC0003DMG400018428	GO:0043531
PGSC0003DMG400018428	GO:0007165
PGSC0003DMG400018428	GO:0006952
PGSC0003DMG400018428	GO:0016787
PGSC0003DMG400018428	GO:0005515
PGSC0003DMG400018428	GO:0050135
PGSC0003DMG400018428	GO:0061809
PGSC0003DMG400029028	GO:0031418
PGSC0003DMG400038970	GO:0016747
PGSC0003DMG400038970	GO:0016740
PGSC0003DMG400038970	GO:0008080
PGSC0003DMG400028988	GO:0016021
PGSC0003DMG400028988	GO:0016020
PGSC0003DMG400017946	GO:0016021
PGSC0003DMG400017946	GO:0005524
PGSC0003DMG400017946	GO:0048544
PGSC0003DMG400017946	GO:0004672
PGSC0003DMG400017946	GO:0006468
PGSC0003DMG400017946	GO:0016020
PGSC0003DMG400007654	GO:0080030
PGSC0003DMG400007654	GO:0080031
PGSC0003DMG400007654	GO:0080032
PGSC0003DMG400007654	GO:0009694
PGSC0003DMG400007654	GO:0009696
PGSC0003DMG403019589	GO:0016021
PGSC0003DMG403019589	GO:0016020
PGSC0003DMG403019589	GO:0005886
PGSC0003DMG400021558	GO:0005515
PGSC0003DMG400011852	GO:0003677
PGSC0003DMG400011852	GO:0005634
PGSC0003DMG400033164	GO:0007165
PGSC0003DMG400033164	GO:0005515
PGSC0003DMG401014605	GO:0016021
PGSC0003DMG401014605	GO:0016020
PGSC0003DMG401014605	GO:0005515
PGSC0003DMG401014605	GO:0005886
PGSC0003DMG400026428	GO:0046524
PGSC0003DMG400026428	GO:0016157
PGSC0003DMG400026428	GO:0005985
PGSC0003DMG400026428	GO:0005794
PGSC0003DMG400026428	GO:0016740
PGSC0003DMG400026428	GO:0016757
PGSC0003DMG400026428	GO:0005986
PGSC0003DMG400002327	GO:0005524
PGSC0003DMG400002327	GO:0004672
PGSC0003DMG400002327	GO:0006468
PGSC0003DMG400026479	GO:0030001
PGSC0003DMG400026479	GO:0046872
PGSC0003DMG402008903	GO:0032875
PGSC0003DMG402008903	GO:0005634
PGSC0003DMG402008903	GO:0045839
PGSC0003DMG400010316	GO:0005634
PGSC0003DMG400010316	GO:0009416
PGSC0003DMG400010316	GO:0009299
PGSC0003DMG400005401	GO:0051091
PGSC0003DMG400012584	GO:0043130
PGSC0003DMG400006498	GO:0016021
PGSC0003DMG400006498	GO:0016310
PGSC0003DMG400006498	GO:0005509
PGSC0003DMG400006498	GO:0005524
PGSC0003DMG400006498	GO:0004672
PGSC0003DMG400006498	GO:0016740
PGSC0003DMG400006498	GO:0000166
PGSC0003DMG400006498	GO:0004674
PGSC0003DMG400006498	GO:0016301
PGSC0003DMG400006498	GO:0006468
PGSC0003DMG400006498	GO:0016020
PGSC0003DMG400006498	GO:0030247
PGSC0003DMG400006498	GO:0005886
PGSC0003DMG400006498	GO:0007166
PGSC0003DMG400037460	GO:0005524
PGSC0003DMG400037460	GO:0004672
PGSC0003DMG400037460	GO:0006468
PGSC0003DMG400037460	GO:0046777
PGSC0003DMG400037460	GO:0005886
PGSC0003DMG400037460	GO:0009506
PGSC0003DMG400017640	GO:0003700
PGSC0003DMG400017640	GO:0006355
PGSC0003DMG400017640	GO:0043565
PGSC0003DMG400017640	GO:0005634
PGSC0003DMG400017640	GO:0003677
PGSC0003DMG400017640	GO:0000981
PGSC0003DMG400017640	GO:0006357
PGSC0003DMG400017640	GO:0045893
PGSC0003DMG400029085	GO:0003824
PGSC0003DMG400029085	GO:0009116
PGSC0003DMG400000519	GO:0016798
PGSC0003DMG400000519	GO:0004553
PGSC0003DMG400000519	GO:0005975
PGSC0003DMG400000519	GO:0006952
PGSC0003DMG400000519	GO:0016787
PGSC0003DMG400000519	GO:0008152
PGSC0003DMG400000519	GO:0046658
PGSC0003DMG400004458	GO:0016021
PGSC0003DMG400004458	GO:0009645
PGSC0003DMG400004458	GO:0016168
PGSC0003DMG400004458	GO:0009765
PGSC0003DMG400004458	GO:0009523
PGSC0003DMG400004458	GO:0018298
PGSC0003DMG400004458	GO:0009409
PGSC0003DMG400004458	GO:0009782
PGSC0003DMG400004458	GO:0042803
PGSC0003DMG400004458	GO:0009644
PGSC0003DMG400004458	GO:0009535
PGSC0003DMG400004458	GO:0009768
PGSC0003DMG400004458	GO:0031409
PGSC0003DMG400004458	GO:0016020
PGSC0003DMG400004458	GO:0009507
PGSC0003DMG400004458	GO:0009536
PGSC0003DMG400004458	GO:0015979
PGSC0003DMG400004458	GO:0009579
PGSC0003DMG400004458	GO:0009522
PGSC0003DMG400004458	GO:0009416
PGSC0003DMG400046998	GO:0008168
PGSC0003DMG400028702	GO:0019745
PGSC0003DMG400028702	GO:0016871
PGSC0003DMG400028702	GO:0005773
PGSC0003DMG400028702	GO:0016866
PGSC0003DMG400028702	GO:0000250
PGSC0003DMG400028702	GO:0042300
PGSC0003DMG400028702	GO:0016104
PGSC0003DMG400028702	GO:0010027
PGSC0003DMG400028702	GO:0009555
PGSC0003DMG400028702	GO:0005811
PGSC0003DMG400000066	GO:0009269
PGSC0003DMG400000066	GO:0005829
PGSC0003DMG400027856	GO:0016740
PGSC0003DMG400027856	GO:0008299
PGSC0003DMG400027856	GO:0004311
PGSC0003DMG400027856	GO:0004659
PGSC0003DMG401019352	GO:0005739
[truncated: 111,255 more rows]

## Sheet: Gene count
ID
PGSC0003DMG400008796
PGSC0003DMG401005942
PGSC0003DMG400013984
PGSC0003DMG400034790
PGSC0003DMG400006368
PGSC0003DMG400009267
PGSC0003DMG402024140
PGSC0003DMG400023922
PGSC0003DMG400010137
PGSC0003DMG400016623
PGSC0003DMG400024399
PGSC0003DMG400020341
PGSC0003DMG400009512
PGSC0003DMG400011752
PGSC0003DMG401004840
PGSC0003DMG400019256
PGSC0003DMG400014007
PGSC0003DMG400002110
PGSC0003DMG400015804
PGSC0003DMG402031759
PGSC0003DMG400005113
PGSC0003DMG400005717
PGSC0003DMG400012704
PGSC0003DMG400022075
PGSC0003DMG401028570
PGSC0003DMG400028182
PGSC0003DMG400015290
PGSC0003DMG400021142
PGSC0003DMG400015591
PGSC0003DMG400005762
PGSC0003DMG400004549
PGSC0003DMG400020377
PGSC0003DMG400030165
PGSC0003DMG400019068
PGSC0003DMG400017106
PGSC0003DMG400010899
PGSC0003DMG400021131
PGSC0003DMG400030793
PGSC0003DMG400002156
PGSC0003DMG400003340
PGSC0003DMG400026871
PGSC0003DMG402021713
PGSC0003DMG400020023
PGSC0003DMG400003032
PGSC0003DMG400012089
PGSC0003DMG400008850
PGSC0003DMG402023841
PGSC0003DMG400023184
PGSC0003DMG400004548
PGSC0003DMG402001531
PGSC0003DMG400026417
PGSC0003DMG400001407
PGSC0003DMG401019255
PGSC0003DMG400034322
PGSC0003DMG400004629
PGSC0003DMG400010490
PGSC0003DMG400011792
PGSC0003DMG401008167
PGSC0003DMG400027888
PGSC0003DMG405015682
PGSC0003DMG400025042
PGSC0003DMG400009268
PGSC0003DMG400000193
PGSC0003DMG400010129
PGSC0003DMG400017007
PGSC0003DMG400004008
PGSC0003DMG400021438
PGSC0003DMG400010901
PGSC0003DMG400026778
PGSC0003DMG400025398
PGSC0003DMG400021785
PGSC0003DMG400024167
PGSC0003DMG400024978
PGSC0003DMG400029195
PGSC0003DMG400008724
PGSC0003DMG400013552
PGSC0003DMG400008801
PGSC0003DMG401026661
PGSC0003DMG400029242
PGSC0003DMG402001926
PGSC0003DMG400014736
PGSC0003DMG402024222
PGSC0003DMG400013227
PGSC0003DMG402029202
PGSC0003DMG400015678
PGSC0003DMG400023235
PGSC0003DMG400018591
PGSC0003DMG400025878
PGSC0003DMG400017135
PGSC0003DMG400002026
PGSC0003DMG402031520
PGSC0003DMG400005269
PGSC0003DMG400029934
PGSC0003DMG400005226
PGSC0003DMG400026722
PGSC0003DMG400015154
PGSC0003DMG400016257
PGSC0003DMG400008761
PGSC0003DMG400016108
PGSC0003DMG400007471
PGSC0003DMG400005931
PGSC0003DMG400031118
PGSC0003DMG400013830
PGSC0003DMG400019472
PGSC0003DMG400011542
PGSC0003DMG400016776
PGSC0003DMG402019255
PGSC0003DMG400013143
PGSC0003DMG400001598
PGSC0003DMG400026277
PGSC0003DMG400002028
PGSC0003DMG400014702
PGSC0003DMG400000676
PGSC0003DMG400013721
PGSC0003DMG400017513
PGSC0003DMG400002321
PGSC0003DMG400011085
PGSC0003DMG400013231
PGSC0003DMG400022911
PGSC0003DMG400023020
PGSC0003DMG400006709
PGSC0003DMG400007462
PGSC0003DMG400004029
PGSC0003DMG401010883
PGSC0003DMG400003757
PGSC0003DMG400029505
PGSC0003DMG400010002
PGSC0003DMG400010995
PGSC0003DMG400017508
PGSC0003DMG400033662
PGSC0003DMG400020497
PGSC0003DMG400011751
PGSC0003DMG400029572
PGSC0003DMG400013577
PGSC0003DMG400008299
PGSC0003DMG400016996
PGSC0003DMG400025620
PGSC0003DMG400002045
PGSC0003DMG402008909
PGSC0003DMG400026401
PGSC0003DMG400029291
PGSC0003DMG400006956
PGSC0003DMG400012763
PGSC0003DMG400025856
PGSC0003DMG402028570
PGSC0003DMG400014299
PGSC0003DMG400014558
PGSC0003DMG400046796
PGSC0003DMG400011750
PGSC0003DMG400007098
PGSC0003DMG400006369
PGSC0003DMG400010753
PGSC0003DMG400026586
PGSC0003DMG400026683
PGSC0003DMG400018865
PGSC0003DMG400044149
PGSC0003DMG400000101
PGSC0003DMG400028173
PGSC0003DMG400031156
PGSC0003DMG400009115
PGSC0003DMG400019418
PGSC0003DMG400021270
PGSC0003DMG400011235
PGSC0003DMG400005590
PGSC0003DMG400022936
PGSC0003DMG400008419
PGSC0003DMG400002123
PGSC0003DMG400002027
PGSC0003DMG400023979
PGSC0003DMG400010207
PGSC0003DMG400030150
PGSC0003DMG400014772
PGSC0003DMG400020972
PGSC0003DMG400022492
PGSC0003DMG400024281
PGSC0003DMG400003042
PGSC0003DMG400019578
PGSC0003DMG401025689
PGSC0003DMG401027561
PGSC0003DMG400018557
PGSC0003DMG400031403
PGSC0003DMG400007565
PGSC0003DMG400001272
PGSC0003DMG402010991
PGSC0003DMG400001529
PGSC0003DMG400040160
PGSC0003DMG400025645
PGSC0003DMG400030809
PGSC0003DMG400004342
PGSC0003DMG400011953
PGSC0003DMG402002685
PGSC0003DMG400015523
PGSC0003DMG401000586
PGSC0003DMG400009414
PGSC0003DMG400018024
PGSC0003DMG400002167
PGSC0003DMG400030462
PGSC0003DMG400010519
PGSC0003DMG400022744
PGSC0003DMG401007406
PGSC0003DMG402006826
PGSC0003DMG402015339
PGSC0003DMG400030382
PGSC0003DMG400015327
PGSC0003DMG402017239
PGSC0003DMG400009514
PGSC0003DMG400032272
PGSC0003DMG400023234
PGSC0003DMG400014836
PGSC0003DMG400021216
PGSC0003DMG400015769
PGSC0003DMG401025083
PGSC0003DMG400014345
PGSC0003DMG400026481
PGSC0003DMG400006840
PGSC0003DMG400010136
PGSC0003DMG400027914
PGSC0003DMG400003912
PGSC0003DMG400016493
PGSC0003DMG400002427
PGSC0003DMG400027736
PGSC0003DMG400016812
PGSC0003DMG401030815
PGSC0003DMG402019589
PGSC0003DMG400017955
PGSC0003DMG400020829
PGSC0003DMG400018133
PGSC0003DMG400025932
PGSC0003DMG400014550
PGSC0003DMG400024754
PGSC0003DMG400005950
PGSC0003DMG400020605
PGSC0003DMG400008137
PGSC0003DMG400028412
PGSC0003DMG400008391
PGSC0003DMG400026899
PGSC0003DMG400005542
PGSC0003DMG400006890
PGSC0003DMG400021806
PGSC0003DMG400010809
PGSC0003DMG402000586
PGSC0003DMG400003531
PGSC0003DMG400003739
PGSC0003DMG400028245
PGSC0003DMG400002047
PGSC0003DMG400024082
PGSC0003DMG402027687
PGSC0003DMG400000493
PGSC0003DMG400010369
PGSC0003DMG400005683
PGSC0003DMG400020189
PGSC0003DMG400014200
PGSC0003DMG400011708
PGSC0003DMG400009705
PGSC0003DMG400014540
PGSC0003DMG400032510
PGSC0003DMG400012536
PGSC0003DMG400019944
PGSC0003DMG400018916
PGSC0003DMG401028122
PGSC0003DMG400008523
PGSC0003DMG400019712
PGSC0003DMG400004712
PGSC0003DMG400025487
PGSC0003DMG400002582
PGSC0003DMG400017936
PGSC0003DMG400013548
PGSC0003DMG403015682
PGSC0003DMG400039685
PGSC0003DMG400008381
PGSC0003DMG400015219
PGSC0003DMG403005679
PGSC0003DMG400020375
PGSC0003DMG400011891
PGSC0003DMG400031457
PGSC0003DMG400002366
PGSC0003DMG400012947
PGSC0003DMG400013460
PGSC0003DMG400012315
PGSC0003DMG401022140
PGSC0003DMG400014982
PGSC0003DMG400017250
PGSC0003DMG400011406
PGSC0003DMG400030503
PGSC0003DMG400013266
PGSC0003DMG400002581
PGSC0003DMG400006455
PGSC0003DMG400008427
PGSC0003DMG400021887
PGSC0003DMG401011095
PGSC0003DMG400017997
PGSC0003DMG400007908
PGSC0003DMG400013045
PGSC0003DMG400024771
PGSC0003DMG400031091
PGSC0003DMG400016616
PGSC0003DMG400015132
PGSC0003DMG402015792
PGSC0003DMG400004369
PGSC0003DMG400006639
PGSC0003DMG400006945
PGSC0003DMG400014064
PGSC0003DMG401001494
PGSC0003DMG400024344
PGSC0003DMG400013702
PGSC0003DMG400023833
PGSC0003DMG400015130
PGSC0003DMG400013684
PGSC0003DMG400020515
PGSC0003DMG400024997
PGSC0003DMG400021791
PGSC0003DMG400020343
PGSC0003DMG400022853
PGSC0003DMG400011012
PGSC0003DMG400016357
PGSC0003DMG400031756
PGSC0003DMG400031399
PGSC0003DMG401006826
PGSC0003DMG401020126
PGSC0003DMG400026594
PGSC0003DMG400017184
PGSC0003DMG400042445
PGSC0003DMG400014774
PGSC0003DMG400022818
PGSC0003DMG400001937
PGSC0003DMG400005284
PGSC0003DMG400000919
PGSC0003DMG400003507
PGSC0003DMG402005942
PGSC0003DMG400029129
PGSC0003DMG400029128
PGSC0003DMG400025027
PGSC0003DMG400003357
PGSC0003DMG400014275
PGSC0003DMG400013680
PGSC0003DMG400016695
PGSC0003DMG400006392
PGSC0003DMG400018131
PGSC0003DMG400021787
PGSC0003DMG400029415
PGSC0003DMG400040318
PGSC0003DMG400008270
PGSC0003DMG400000405
PGSC0003DMG400020016
PGSC0003DMG400003619
PGSC0003DMG400019437
PGSC0003DMG400029406
PGSC0003DMG400020898
PGSC0003DMG400000129
PGSC0003DMG400002946
PGSC0003DMG400033563
PGSC0003DMG401030920
PGSC0003DMG401024894
PGSC0003DMG400008087
PGSC0003DMG400011926
PGSC0003DMG400010215
PGSC0003DMG400019235
PGSC0003DMG400018428
PGSC0003DMG400029028
PGSC0003DMG400038970
PGSC0003DMG400028988
PGSC0003DMG400017946
PGSC0003DMG400007654
PGSC0003DMG403019589
PGSC0003DMG400021558
PGSC0003DMG400011852
PGSC0003DMG400033164
PGSC0003DMG401014605
PGSC0003DMG400026428
PGSC0003DMG400002327
PGSC0003DMG400026479
PGSC0003DMG402008903
PGSC0003DMG400010316
PGSC0003DMG400005401
PGSC0003DMG400012584
PGSC0003DMG400006498
PGSC0003DMG400037460
PGSC0003DMG400017640
PGSC0003DMG400029085
PGSC0003DMG400000519
PGSC0003DMG400004458
PGSC0003DMG400046998
PGSC0003DMG400028702
PGSC0003DMG400000066
PGSC0003DMG400027856
PGSC0003DMG401019352
PGSC0003DMG400026885
PGSC0003DMG400029364
PGSC0003DMG400010815
PGSC0003DMG400031105
PGSC0003DMG400010587
PGSC0003DMG400017373
PGSC0003DMG400001016
PGSC0003DMG400013616
PGSC0003DMG400029239
PGSC0003DMG400009921
PGSC0003DMG400007915
PGSC0003DMG400030164
PGSC0003DMG400005886
PGSC0003DMG400015289
PGSC0003DMG400005468
PGSC0003DMG400027947
PGSC0003DMG400004000
PGSC0003DMG400026978
PGSC0003DMG400001204
PGSC0003DMG400003849
PGSC0003DMG400016742
PGSC0003DMG400030663
PGSC0003DMG400014863
PGSC0003DMG400012987
PGSC0003DMG400005541
PGSC0003DMG400027748
PGSC0003DMG400023680
PGSC0003DMG401001731
PGSC0003DMG400000339
PGSC0003DMG400011959
PGSC0003DMG400015060
PGSC0003DMG400028953
PGSC0003DMG400030910
PGSC0003DMG400014753
PGSC0003DMG400021966
PGSC0003DMG400003697
PGSC0003DMG400016906
PGSC0003DMG400029504
PGSC0003DMG400023028
PGSC0003DMG400003002
PGSC0003DMG400005967
PGSC0003DMG400029153
PGSC0003DMG400012578
PGSC0003DMG400016050
PGSC0003DMG400046726
PGSC0003DMG402011095
PGSC0003DMG400021068
PGSC0003DMG400015595
PGSC0003DMG400030082
PGSC0003DMG400007561
PGSC0003DMG400042273
PGSC0003DMG400007534
PGSC0003DMG401004220
PGSC0003DMG400021136
PGSC0003DMG402000517
PGSC0003DMG400030063
PGSC0003DMG400021948
PGSC0003DMG401025662
PGSC0003DMG400006354
PGSC0003DMG400015267
PGSC0003DMG400030927
PGSC0003DMG400009472
PGSC0003DMG400006480
PGSC0003DMG400029956
PGSC0003DMG400030919
PGSC0003DMG400010859
PGSC0003DMG400013016
PGSC0003DMG400002351
PGSC0003DMG400012466
PGSC0003DMG400026323
PGSC0003DMG400002423
PGSC0003DMG400023325
PGSC0003DMG400022263
PGSC0003DMG400014108
PGSC0003DMG400011010
PGSC0003DMG400019483
PGSC0003DMG402013013
PGSC0003DMG400019402
PGSC0003DMG400024149
PGSC0003DMG401025807
PGSC0003DMG400015156
PGSC0003DMG400019456
PGSC0003DMG400011731
PGSC0003DMG400001144
PGSC0003DMG402015935
PGSC0003DMG400030364
PGSC0003DMG400005491
PGSC0003DMG400015618
PGSC0003DMG401011117
PGSC0003DMG400033567
PGSC0003DMG400035573
PGSC0003DMG400035539
PGSC0003DMG400010504
PGSC0003DMG400017812
PGSC0003DMG400000448
PGSC0003DMG400000435
PGSC0003DMG400027916
PGSC0003DMG400000816
PGSC0003DMG400006982
PGSC0003DMG401018223
PGSC0003DMG400030521
PGSC0003DMG400013983
PGSC0003DMG400003084
PGSC0003DMG400021416
PGSC0003DMG400006378
PGSC0003DMG400019983
PGSC0003DMG400014222
PGSC0003DMG400017191
PGSC0003DMG400026782
PGSC0003DMG400031848
PGSC0003DMG400003428
PGSC0003DMG400027609
PGSC0003DMG400007743
PGSC0003DMG400011604
PGSC0003DMG400022890
PGSC0003DMG400013161
PGSC0003DMG400018429
PGSC0003DMG400019913
PGSC0003DMG400015342
PGSC0003DMG400006708
PGSC0003DMG400029718
PGSC0003DMG400006838
PGSC0003DMG400010131
PGSC0003DMG400001372
PGSC0003DMG400015414
PGSC0003DMG400032269
PGSC0003DMG400040729
PGSC0003DMG402015976
PGSC0003DMG400016068
PGSC0003DMG400017202
PGSC0003DMG400022493
PGSC0003DMG400001915
PGSC0003DMG400014336
PGSC0003DMG400018446
PGSC0003DMG400040663
PGSC0003DMG400008309
PGSC0003DMG400011502
PGSC0003DMG400001988
PGSC0003DMG400014766
PGSC0003DMG400000048
PGSC0003DMG400009633
PGSC0003DMG400015104
PGSC0003DMG400016599
PGSC0003DMG400020141
PGSC0003DMG402005881
PGSC0003DMG400023543
PGSC0003DMG400019956
PGSC0003DMG400007373
PGSC0003DMG400007741
PGSC0003DMG400000367
PGSC0003DMG400020697
PGSC0003DMG400029863
PGSC0003DMG400031062
PGSC0003DMG403013246
PGSC0003DMG400000766
PGSC0003DMG400022344
PGSC0003DMG401017241
PGSC0003DMG400007405
PGSC0003DMG400015410
PGSC0003DMG400005116
PGSC0003DMG400013473
PGSC0003DMG400044730
PGSC0003DMG400017570
PGSC0003DMG400027075
PGSC0003DMG400026220
PGSC0003DMG400002800
PGSC0003DMG400010728
PGSC0003DMG400015171
PGSC0003DMG400014649
PGSC0003DMG400017299
PGSC0003DMG400021111
PGSC0003DMG400026543
PGSC0003DMG400012019
PGSC0003DMG400029263
PGSC0003DMG400010221
PGSC0003DMG400028802
PGSC0003DMG400019536
PGSC0003DMG400004083
PGSC0003DMG400029298
PGSC0003DMG400026222
PGSC0003DMG401022752
PGSC0003DMG400024109
PGSC0003DMG400012020
PGSC0003DMG400000046
PGSC0003DMG402004840
PGSC0003DMG400021406
PGSC0003DMG400029360
PGSC0003DMG400032231
PGSC0003DMG400023850
PGSC0003DMG400017908
PGSC0003DMG400018744
PGSC0003DMG400041182
PGSC0003DMG400031020
PGSC0003DMG400015405
PGSC0003DMG400002682
PGSC0003DMG400030843
PGSC0003DMG400020660
PGSC0003DMG400012100
PGSC0003DMG400036059
PGSC0003DMG401016989
PGSC0003DMG401027133
PGSC0003DMG400003329
PGSC0003DMG400007335
PGSC0003DMG400006185
PGSC0003DMG400030001
PGSC0003DMG400015005
PGSC0003DMG400003563
PGSC0003DMG400009686
PGSC0003DMG400013891
PGSC0003DMG400023107
PGSC0003DMG400030234
PGSC0003DMG400017278
PGSC0003DMG400003171
PGSC0003DMG400021574
PGSC0003DMG401022117
PGSC0003DMG400010283
PGSC0003DMG400030104
PGSC0003DMG400032825
PGSC0003DMG400005560
PGSC0003DMG400002166
PGSC0003DMG400011558
PGSC0003DMG400031849
PGSC0003DMG400021676
PGSC0003DMG400023518
PGSC0003DMG400022430
PGSC0003DMG400033028
PGSC0003DMG400012471
PGSC0003DMG401014290
PGSC0003DMG400003427
PGSC0003DMG400014322
PGSC0003DMG401009929
PGSC0003DMG400001387
PGSC0003DMG400003608
PGSC0003DMG400005157
PGSC0003DMG403005640
PGSC0003DMG401007575
PGSC0003DMG400000505
PGSC0003DMG400030541
PGSC0003DMG400016723
PGSC0003DMG400014329
PGSC0003DMG400014956
PGSC0003DMG400024075
PGSC0003DMG400030402
PGSC0003DMG402004425
PGSC0003DMG400007733
PGSC0003DMG401004423
PGSC0003DMG400024764
PGSC0003DMG400011311
PGSC0003DMG400009511
PGSC0003DMG400020691
PGSC0003DMG400002161
PGSC0003DMG400015008
PGSC0003DMG400020587
PGSC0003DMG400005582
PGSC0003DMG400011517
PGSC0003DMG400000432
PGSC0003DMG400022153
PGSC0003DMG400046324
PGSC0003DMG400008389
PGSC0003DMG400014959
PGSC0003DMG400025586
PGSC0003DMG400013029
PGSC0003DMG400002920
PGSC0003DMG400021972
PGSC0003DMG400028156
PGSC0003DMG400032157
PGSC0003DMG400001361
PGSC0003DMG400009477
PGSC0003DMG400013696
PGSC0003DMG400013627
PGSC0003DMG400014062
PGSC0003DMG400031486
PGSC0003DMG400017524
PGSC0003DMG400026148
PGSC0003DMG400015318
PGSC0003DMG400029938
PGSC0003DMG400024362
PGSC0003DMG400033058
PGSC0003DMG400008492
PGSC0003DMG400012924
PGSC0003DMG400015889
PGSC0003DMG400025949
PGSC0003DMG400016287
PGSC0003DMG400011282
PGSC0003DMG400032190
PGSC0003DMG401005699
PGSC0003DMG400020206
PGSC0003DMG400023764
PGSC0003DMG400000932
PGSC0003DMG400028601
PGSC0003DMG400009530
PGSC0003DMG400001992
PGSC0003DMG400032243
PGSC0003DMG400011685
PGSC0003DMG400017306
PGSC0003DMG400000759
PGSC0003DMG400005783
PGSC0003DMG400007760
PGSC0003DMG400021672
PGSC0003DMG400011933
PGSC0003DMG400004553
PGSC0003DMG400039453
PGSC0003DMG400005641
PGSC0003DMG400005418
PGSC0003DMG400017119
PGSC0003DMG400024829
PGSC0003DMG400000746
PGSC0003DMG400018138
PGSC0003DMG400019900
PGSC0003DMG400020042
PGSC0003DMG400030470
PGSC0003DMG400003107
PGSC0003DMG400013325
PGSC0003DMG400014902
PGSC0003DMG402016112
PGSC0003DMG400009409
PGSC0003DMG400011815
PGSC0003DMG400042292
PGSC0003DMG400010310
PGSC0003DMG400006692
PGSC0003DMG400006785
PGSC0003DMG400023741
PGSC0003DMG400026814
PGSC0003DMG400030771
PGSC0003DMG401026150
PGSC0003DMG400033634
PGSC0003DMG400006951
PGSC0003DMG400014936
PGSC0003DMG400009822
PGSC0003DMG400021454
PGSC0003DMG400014838
PGSC0003DMG400015286
PGSC0003DMG400015693
PGSC0003DMG400029597
PGSC0003DMG402017090
PGSC0003DMG400024120
PGSC0003DMG400024580
PGSC0003DMG400002903
PGSC0003DMG400010465
PGSC0003DMG400010963
PGSC0003DMG401026153
PGSC0003DMG400031758
PGSC0003DMG400004109
PGSC0003DMG400014104
PGSC0003DMG400022030
PGSC0003DMG400014459
PGSC0003DMG400019823
PGSC0003DMG400008298
PGSC0003DMG400023849
PGSC0003DMG400006880
PGSC0003DMG400005638
PGSC0003DMG400002963
PGSC0003DMG402000020
PGSC0003DMG400024746
PGSC0003DMG400003238
PGSC0003DMG400020798
PGSC0003DMG400005982
PGSC0003DMG400005138
PGSC0003DMG400014778
PGSC0003DMG400007876
PGSC0003DMG400013450
PGSC0003DMG400004478
PGSC0003DMG400010132
PGSC0003DMG400022674
PGSC0003DMG400000783
PGSC0003DMG400007825
PGSC0003DMG400029515
PGSC0003DMG400014093
PGSC0003DMG400000843
PGSC0003DMG400016324
PGSC0003DMG400013461
PGSC0003DMG400019083
PGSC0003DMG400033363
PGSC0003DMG400002272
PGSC0003DMG400017234
PGSC0003DMG400014092
PGSC0003DMG402027133
PGSC0003DMG400026364
PGSC0003DMG400023033
PGSC0003DMG400001340
PGSC0003DMG400017237
PGSC0003DMG400015242
PGSC0003DMG401018962
PGSC0003DMG400001921
PGSC0003DMG400015534
PGSC0003DMG400029072
PGSC0003DMG400031233
PGSC0003DMG400033884
PGSC0003DMG400034095
PGSC0003DMG402010281
PGSC0003DMG400000866
PGSC0003DMG400002930
PGSC0003DMG400025349
PGSC0003DMG400019294
PGSC0003DMG400026382
PGSC0003DMG400019525
PGSC0003DMG400015593
PGSC0003DMG400030782
PGSC0003DMG400031194
PGSC0003DMG400011336
PGSC0003DMG400033906
PGSC0003DMG400031742
PGSC0003DMG403030312
PGSC0003DMG400012492
PGSC0003DMG400019072
PGSC0003DMG400030640
PGSC0003DMG400018688
PGSC0003DMG400021108
PGSC0003DMG403004220
PGSC0003DMG401007871
PGSC0003DMG402004220
PGSC0003DMG400008310
PGSC0003DMG400024062
PGSC0003DMG400017223
PGSC0003DMG400030259
PGSC0003DMG400017064
PGSC0003DMG400026789
PGSC0003DMG401023603
PGSC0003DMG400012481
PGSC0003DMG400007815
PGSC0003DMG400022222
PGSC0003DMG400000621
PGSC0003DMG400045370
PGSC0003DMG400001339
PGSC0003DMG400008160
PGSC0003DMG400018191
PGSC0003DMG400029341
PGSC0003DMG401015935
PGSC0003DMG400001707
PGSC0003DMG400015507
PGSC0003DMG400025226
PGSC0003DMG400009881
PGSC0003DMG400014803
PGSC0003DMG400007387
PGSC0003DMG400010768
PGSC0003DMG400012888
PGSC0003DMG400031385
PGSC0003DMG400016004
PGSC0003DMG400024377
PGSC0003DMG400010258
PGSC0003DMG400005689
PGSC0003DMG400016433
PGSC0003DMG400008059
PGSC0003DMG400018245
PGSC0003DMG400006672
PGSC0003DMG400013272
PGSC0003DMG400002631
PGSC0003DMG400021944
PGSC0003DMG400025099
PGSC0003DMG400019758
PGSC0003DMG400028617
PGSC0003DMG400001399
PGSC0003DMG402028565
PGSC0003DMG400010718
PGSC0003DMG400020805
PGSC0003DMG402014734
PGSC0003DMG400012653
PGSC0003DMG400023671
PGSC0003DMG400021824
PGSC0003DMG400027968
PGSC0003DMG400030163
PGSC0003DMG400005476
PGSC0003DMG400016122
PGSC0003DMG400010771
PGSC0003DMG400026332
PGSC0003DMG400026631
PGSC0003DMG400001378
PGSC0003DMG400009902
PGSC0003DMG400024067
PGSC0003DMG400022217
PGSC0003DMG400030828
PGSC0003DMG400002899
PGSC0003DMG400016917
PGSC0003DMG401009127
PGSC0003DMG400003380
PGSC0003DMG400015462
PGSC0003DMG400018064
PGSC0003DMG400000850
PGSC0003DMG400005693
PGSC0003DMG400009762
PGSC0003DMG400002910
PGSC0003DMG400005778
PGSC0003DMG400007928
PGSC0003DMG400028622
PGSC0003DMG400018517
PGSC0003DMG400014600
PGSC0003DMG400028438
PGSC0003DMG400004800
PGSC0003DMG400018241
PGSC0003DMG401003025
PGSC0003DMG401030252
PGSC0003DMG400028490
PGSC0003DMG400037185
PGSC0003DMG400007239
PGSC0003DMG400019733
PGSC0003DMG400002833
PGSC0003DMG400025455
PGSC0003DMG400014776
PGSC0003DMG400009374
PGSC0003DMG400001774
PGSC0003DMG400030395
PGSC0003DMG400032582
PGSC0003DMG400038305
PGSC0003DMG400017969
PGSC0003DMG400011927
PGSC0003DMG400017440
PGSC0003DMG400005112
PGSC0003DMG400007850
PGSC0003DMG400013803
PGSC0003DMG400022145
PGSC0003DMG400027473
PGSC0003DMG400022741
PGSC0003DMG400032148
PGSC0003DMG402028319
PGSC0003DMG400029164
PGSC0003DMG400019062
PGSC0003DMG400026131
PGSC0003DMG400017341
PGSC0003DMG400001948
PGSC0003DMG400024289
PGSC0003DMG400004078
PGSC0003DMG400031320
PGSC0003DMG400010154
PGSC0003DMG400027409
PGSC0003DMG400001077
PGSC0003DMG400029524
PGSC0003DMG400006761
PGSC0003DMG400004287
PGSC0003DMG400026322
PGSC0003DMG400010625
PGSC0003DMG400009570
PGSC0003DMG400031150
PGSC0003DMG400007188
PGSC0003DMG401029709
PGSC0003DMG400007258
PGSC0003DMG400012839
PGSC0003DMG400008978
PGSC0003DMG402014186
PGSC0003DMG400027200
PGSC0003DMG400008372
PGSC0003DMG400004286
PGSC0003DMG400010285
PGSC0003DMG400027330
PGSC0003DMG400003457
PGSC0003DMG400014755
PGSC0003DMG400020777
PGSC0003DMG400015344
PGSC0003DMG400042926
PGSC0003DMG400011480
PGSC0003DMG400006400
PGSC0003DMG400010471
PGSC0003DMG400038453
PGSC0003DMG400026700
PGSC0003DMG400002291
PGSC0003DMG400008916
PGSC0003DMG400014156
PGSC0003DMG400000988
PGSC0003DMG400017654
PGSC0003DMG400027025
PGSC0003DMG400014539
PGSC0003DMG402025438
PGSC0003DMG400010742
PGSC0003DMG400007436
PGSC0003DMG400018803
PGSC0003DMG400028268
PGSC0003DMG400011052
PGSC0003DMG400017124
PGSC0003DMG400010950
PGSC0003DMG400028185
PGSC0003DMG400029801
PGSC0003DMG400010342
PGSC0003DMG400003091
PGSC0003DMG400012997
PGSC0003DMG400004301
PGSC0003DMG400030062
PGSC0003DMG401000506
PGSC0003DMG401000526
PGSC0003DMG400025538
PGSC0003DMG400013546
PGSC0003DMG400024968
PGSC0003DMG400008854
PGSC0003DMG400006319
PGSC0003DMG400013478
PGSC0003DMG400013804
PGSC0003DMG400028021
PGSC0003DMG400029643
PGSC0003DMG402032256
PGSC0003DMG400030113
PGSC0003DMG400002173
PGSC0003DMG400020118
PGSC0003DMG400030762
PGSC0003DMG400016915
PGSC0003DMG400027631
PGSC0003DMG400016247
PGSC0003DMG400020209
PGSC0003DMG400032817
PGSC0003DMG400013547
PGSC0003DMG400014717
PGSC0003DMG400001671
PGSC0003DMG400015232
PGSC0003DMG400007929
PGSC0003DMG400009635
PGSC0003DMG400010495
PGSC0003DMG400012867
PGSC0003DMG400016007
PGSC0003DMG400016808
PGSC0003DMG400037235
PGSC0003DMG400020604
PGSC0003DMG400013396
PGSC0003DMG400042346
PGSC0003DMG400011404
PGSC0003DMG400030138
PGSC0003DMG400023910
PGSC0003DMG400018458
PGSC0003DMG400016967
PGSC0003DMG400015850
PGSC0003DMG400000411
PGSC0003DMG401004944
PGSC0003DMG400014917
PGSC0003DMG400029738
PGSC0003DMG400004233
PGSC0003DMG400000347
PGSC0003DMG400000996
PGSC0003DMG400003927
PGSC0003DMG400010601
PGSC0003DMG400014063
PGSC0003DMG400017249
PGSC0003DMG400030855
PGSC0003DMG400011669
PGSC0003DMG400017666
PGSC0003DMG400026461
PGSC0003DMG402029595
PGSC0003DMG400002697
PGSC0003DMG400021509
PGSC0003DMG400041767
PGSC0003DMG400018712
PGSC0003DMG400025495
PGSC0003DMG400030009
PGSC0003DMG400021945
PGSC0003DMG400008421
PGSC0003DMG400009482
PGSC0003DMG400011999
PGSC0003DMG400021508
PGSC0003DMG400010232
PGSC0003DMG400001682
PGSC0003DMG400012926
PGSC0003DMG400001015
PGSC0003DMG400004413
PGSC0003DMG400006327
PGSC0003DMG400006887
PGSC0003DMG400010148
PGSC0003DMG400018358
PGSC0003DMG400036760
PGSC0003DMG400022315
PGSC0003DMG400027509
PGSC0003DMG400032498
PGSC0003DMG400012657
PGSC0003DMG400001001
PGSC0003DMG400024984
PGSC0003DMG400021784
PGSC0003DMG400000502
PGSC0003DMG400007317
PGSC0003DMG400034328
PGSC0003DMG400028984
PGSC0003DMG400020321
PGSC0003DMG400006462
PGSC0003DMG400026159
PGSC0003DMG400010224
PGSC0003DMG400001680
PGSC0003DMG400010163
PGSC0003DMG400020761
PGSC0003DMG401019811
PGSC0003DMG400024253
PGSC0003DMG400029719
PGSC0003DMG400010222
PGSC0003DMG400030856
PGSC0003DMG400028175
PGSC0003DMG400031013
PGSC0003DMG400017556
PGSC0003DMG401022901
PGSC0003DMG400014248
PGSC0003DMG400024479
PGSC0003DMG400000587
PGSC0003DMG400018240
PGSC0003DMG400018925
PGSC0003DMG400029488
PGSC0003DMG400047336
PGSC0003DMG400004311
PGSC0003DMG400019526
PGSC0003DMG400023144
PGSC0003DMG400006239
PGSC0003DMG400015737
PGSC0003DMG400020534
PGSC0003DMG401023052
PGSC0003DMG402011427
PGSC0003DMG403029631
PGSC0003DMG400003820
PGSC0003DMG400008261
PGSC0003DMG402028685
PGSC0003DMG400025439
PGSC0003DMG400021684
PGSC0003DMG400031788
PGSC0003DMG402025083
PGSC0003DMG400000295
PGSC0003DMG400017737
PGSC0003DMG400026077
PGSC0003DMG400024874
PGSC0003DMG400008564
PGSC0003DMG400041508
PGSC0003DMG400031317
PGSC0003DMG402007871
PGSC0003DMG400000718
PGSC0003DMG401019343
PGSC0003DMG400027083
PGSC0003DMG400024410
PGSC0003DMG400013619
PGSC0003DMG400014732
PGSC0003DMG400031050
PGSC0003DMG400013010
PGSC0003DMG400006163
PGSC0003DMG400006502
PGSC0003DMG400013090
PGSC0003DMG400013091
PGSC0003DMG400014739
PGSC0003DMG400014787
PGSC0003DMG400015653
PGSC0003DMG400027966
PGSC0003DMG400027976
PGSC0003DMG400030985
PGSC0003DMG400007867
PGSC0003DMG400013393
PGSC0003DMG400015557
PGSC0003DMG400018066
PGSC0003DMG400033042
PGSC0003DMG400033583
PGSC0003DMG400013485
PGSC0003DMG400024987
PGSC0003DMG400008301
PGSC0003DMG400010128
PGSC0003DMG400027749
PGSC0003DMG400004456
PGSC0003DMG400027874
PGSC0003DMG400013398
PGSC0003DMG400017751
PGSC0003DMG400014771
PGSC0003DMG400007665
PGSC0003DMG402011400
PGSC0003DMG400031787
PGSC0003DMG400028153
PGSC0003DMG401004392
PGSC0003DMG400015310
PGSC0003DMG400021206
PGSC0003DMG402004611
PGSC0003DMG400019441
PGSC0003DMG400021051
PGSC0003DMG401031759
PGSC0003DMG400013415
PGSC0003DMG400022572
PGSC0003DMG400023909
PGSC0003DMG400026046
PGSC0003DMG400031211
PGSC0003DMG402018005
PGSC0003DMG400013975
PGSC0003DMG400024627
PGSC0003DMG400026260
PGSC0003DMG400023130
PGSC0003DMG400027042
PGSC0003DMG400018095
PGSC0003DMG400024068
PGSC0003DMG400019510
PGSC0003DMG400019177
PGSC0003DMG400019652
PGSC0003DMG400010612
PGSC0003DMG400026320
PGSC0003DMG400014243
PGSC0003DMG401003118
PGSC0003DMG400011265
PGSC0003DMG400010051
PGSC0003DMG400026433
PGSC0003DMG400014823
PGSC0003DMG400020814
PGSC0003DMG400024618
PGSC0003DMG400001373
PGSC0003DMG400003901
PGSC0003DMG400004235
PGSC0003DMG400010320
PGSC0003DMG400015348
PGSC0003DMG400017718
PGSC0003DMG400019732
PGSC0003DMG400024477
PGSC0003DMG400027467
PGSC0003DMG400030561
PGSC0003DMG400037851
PGSC0003DMG402011945
PGSC0003DMG402000201
PGSC0003DMG400031832
PGSC0003DMG400009782
PGSC0003DMG400029793
PGSC0003DMG400028376
PGSC0003DMG400025988
PGSC0003DMG400019460
PGSC0003DMG400008962
PGSC0003DMG400014862
PGSC0003DMG400028883
PGSC0003DMG400033903
PGSC0003DMG401017590
PGSC0003DMG401015455
PGSC0003DMG400027797
PGSC0003DMG400022929
PGSC0003DMG400009276
PGSC0003DMG400007977
PGSC0003DMG400007622
PGSC0003DMG400024693
PGSC0003DMG400018169
PGSC0003DMG400026801
PGSC0003DMG402020445
PGSC0003DMG400004802
PGSC0003DMG400016749
PGSC0003DMG400011530
PGSC0003DMG400024274
PGSC0003DMG400000233
PGSC0003DMG401029058
PGSC0003DMG400010619
PGSC0003DMG400027508
PGSC0003DMG400031313
PGSC0003DMG400015799
PGSC0003DMG400001060
PGSC0003DMG400014433
PGSC0003DMG400031360
PGSC0003DMG400026632
PGSC0003DMG400018761
PGSC0003DMG400018216
PGSC0003DMG400018513
PGSC0003DMG400011954
PGSC0003DMG400037923
PGSC0003DMG400027276
PGSC0003DMG400002699
PGSC0003DMG400015270
PGSC0003DMG402000479
PGSC0003DMG400015265
PGSC0003DMG400017998
PGSC0003DMG400047346
PGSC0003DMG400016884
PGSC0003DMG402006783
PGSC0003DMG402029312
PGSC0003DMG400021561
PGSC0003DMG400011548
PGSC0003DMG400018678
PGSC0003DMG400008493
PGSC0003DMG400031151
PGSC0003DMG401021616
PGSC0003DMG400013096
PGSC0003DMG400016286
PGSC0003DMG400028152
PGSC0003DMG400031420
PGSC0003DMG400000337
PGSC0003DMG400002213
PGSC0003DMG400004599
PGSC0003DMG400021685
PGSC0003DMG400017594
PGSC0003DMG400012703
PGSC0003DMG400022365
PGSC0003DMG400002312
PGSC0003DMG400008018
PGSC0003DMG400020467
PGSC0003DMG400014634
PGSC0003DMG400024478
PGSC0003DMG400030827
PGSC0003DMG400012325
PGSC0003DMG400021877
PGSC0003DMG400004876
PGSC0003DMG400005035
PGSC0003DMG400012012
PGSC0003DMG400036851
PGSC0003DMG400002174
PGSC0003DMG400027742
PGSC0003DMG400023599
PGSC0003DMG400022096
PGSC0003DMG400021422
PGSC0003DMG400023445
PGSC0003DMG400021376
PGSC0003DMG400003192
PGSC0003DMG400005896
PGSC0003DMG400004727
PGSC0003DMG400008554
PGSC0003DMG400010170
PGSC0003DMG400015873
PGSC0003DMG400022224
PGSC0003DMG400018668
PGSC0003DMG400019039
PGSC0003DMG401014734
PGSC0003DMG402015682
PGSC0003DMG400025174
PGSC0003DMG400008563
PGSC0003DMG400021720
PGSC0003DMG400022775
PGSC0003DMG400003044
PGSC0003DMG400003228
PGSC0003DMG400010509
PGSC0003DMG400022488
PGSC0003DMG400010405
PGSC0003DMG400006558
PGSC0003DMG402013304
PGSC0003DMG400012111
PGSC0003DMG400021128
PGSC0003DMG400003906
PGSC0003DMG400016610
PGSC0003DMG400018652
PGSC0003DMG400019301
PGSC0003DMG400028394
PGSC0003DMG401023679
PGSC0003DMG400024308
PGSC0003DMG400025558
PGSC0003DMG400030533
PGSC0003DMG400003548
PGSC0003DMG400008164
PGSC0003DMG400019720
PGSC0003DMG400020510
PGSC0003DMG400009584
PGSC0003DMG400005802
PGSC0003DMG402013687
PGSC0003DMG400008313
PGSC0003DMG400008639
PGSC0003DMG400009761
PGSC0003DMG400015351
PGSC0003DMG400021926
PGSC0003DMG400030291
PGSC0003DMG400006530
PGSC0003DMG400013427
PGSC0003DMG400015124
PGSC0003DMG400015128
PGSC0003DMG400016889
PGSC0003DMG400025706
PGSC0003DMG400028793
PGSC0003DMG402006653
PGSC0003DMG402012406
PGSC0003DMG400021811
PGSC0003DMG400040591
PGSC0003DMG400012762
PGSC0003DMG400020334
PGSC0003DMG400013752
PGSC0003DMG400026257
PGSC0003DMG400000791
PGSC0003DMG400024409
PGSC0003DMG400005442
PGSC0003DMG400023322
PGSC0003DMG400032814
PGSC0003DMG401005679
PGSC0003DMG400017434
PGSC0003DMG400003424
PGSC0003DMG400023435
PGSC0003DMG400018080
PGSC0003DMG400027125
PGSC0003DMG400004574
PGSC0003DMG402006673
PGSC0003DMG400010770
PGSC0003DMG400005780
PGSC0003DMG400028809
PGSC0003DMG400023345
PGSC0003DMG400009399
PGSC0003DMG400017379
PGSC0003DMG400006719
PGSC0003DMG400016643
PGSC0003DMG400019573
PGSC0003DMG400026267
PGSC0003DMG400032286
PGSC0003DMG400033131
PGSC0003DMG400036774
PGSC0003DMG402020581
PGSC0003DMG400011843
PGSC0003DMG400016405
PGSC0003DMG400020897
PGSC0003DMG403006826
PGSC0003DMG400001708
PGSC0003DMG400000045
PGSC0003DMG400030918
PGSC0003DMG400016482
PGSC0003DMG400015622
PGSC0003DMG402026153
PGSC0003DMG400035146
PGSC0003DMG400016441
PGSC0003DMG400018047
PGSC0003DMG400018349
PGSC0003DMG400023842
PGSC0003DMG400001683
PGSC0003DMG400028591
PGSC0003DMG400015579
PGSC0003DMG400017458
PGSC0003DMG401029824
PGSC0003DMG400025843
PGSC0003DMG400002720
PGSC0003DMG400017322
PGSC0003DMG400000685
PGSC0003DMG402019636
PGSC0003DMG400017233
PGSC0003DMG400016908
PGSC0003DMG400002276
PGSC0003DMG400014870
PGSC0003DMG400013887
PGSC0003DMG400007880
PGSC0003DMG400011199
PGSC0003DMG400012347
PGSC0003DMG400017185
PGSC0003DMG400029959
PGSC0003DMG400010750
PGSC0003DMG400007331
PGSC0003DMG400022181
PGSC0003DMG400007123
PGSC0003DMG400008764
PGSC0003DMG400020213
PGSC0003DMG400022312
PGSC0003DMG401034311
PGSC0003DMG400044152
PGSC0003DMG400014228
PGSC0003DMG400006160
PGSC0003DMG400027087
PGSC0003DMG400033099
PGSC0003DMG400008337
PGSC0003DMG400024936
PGSC0003DMG400014262
PGSC0003DMG400025771
PGSC0003DMG402029358
PGSC0003DMG400021673
PGSC0003DMG400007227
PGSC0003DMG400003585
PGSC0003DMG400013334
PGSC0003DMG400014379
PGSC0003DMG400019446
PGSC0003DMG400000716
PGSC0003DMG400006796
PGSC0003DMG400010430
PGSC0003DMG400013641
PGSC0003DMG400015020
PGSC0003DMG400017738
PGSC0003DMG400019459
PGSC0003DMG400023612
PGSC0003DMG400029330
PGSC0003DMG400039325
PGSC0003DMG401009879
PGSC0003DMG400009732
PGSC0003DMG400015779
PGSC0003DMG400027287
PGSC0003DMG401012139
PGSC0003DMG400002824
PGSC0003DMG400029400
PGSC0003DMG400004786
PGSC0003DMG400007180
PGSC0003DMG400000545
PGSC0003DMG400027047
PGSC0003DMG401028367
PGSC0003DMG400032821
PGSC0003DMG400019395
PGSC0003DMG400005673
PGSC0003DMG400003193
PGSC0003DMG400009602
PGSC0003DMG400014589
PGSC0003DMG400029652
PGSC0003DMG400031811
PGSC0003DMG401012965
PGSC0003DMG400003343
PGSC0003DMG400002426
PGSC0003DMG400004363
PGSC0003DMG400028571
PGSC0003DMG400026534
PGSC0003DMG400032537
PGSC0003DMG400019531
PGSC0003DMG400030450
PGSC0003DMG400000297
PGSC0003DMG400024906
PGSC0003DMG401021057
PGSC0003DMG400000028
PGSC0003DMG400000805
PGSC0003DMG401028529
PGSC0003DMG400004934
PGSC0003DMG400021814
PGSC0003DMG400016663
PGSC0003DMG401018057
PGSC0003DMG400010300
PGSC0003DMG400007506
PGSC0003DMG400007996
PGSC0003DMG400019408
PGSC0003DMG400025964
PGSC0003DMG400026967
PGSC0003DMG400027582
PGSC0003DMG400029852
PGSC0003DMG400035769
PGSC0003DMG400016573
PGSC0003DMG400021628
PGSC0003DMG400010455
PGSC0003DMG400027364
PGSC0003DMG400008545
PGSC0003DMG400014386
PGSC0003DMG400000744
PGSC0003DMG400014773
PGSC0003DMG400043599
PGSC0003DMG400020190
PGSC0003DMG401028184
PGSC0003DMG400009245
PGSC0003DMG400006843
PGSC0003DMG400001474
PGSC0003DMG400004439
PGSC0003DMG401005482
PGSC0003DMG402024517
PGSC0003DMG400003115
PGSC0003DMG400015709
PGSC0003DMG400010035
PGSC0003DMG400023598
PGSC0003DMG400022134
PGSC0003DMG400014664
PGSC0003DMG401021564
PGSC0003DMG400031326
PGSC0003DMG400027357
PGSC0003DMG400010166
PGSC0003DMG400001989
PGSC0003DMG401012339
PGSC0003DMG400019189
PGSC0003DMG400021364
PGSC0003DMG400014740
PGSC0003DMG400016572
PGSC0003DMG400017452
PGSC0003DMG400019172
PGSC0003DMG400023221
PGSC0003DMG400031358
PGSC0003DMG400031411
PGSC0003DMG400045810
PGSC0003DMG401002685
PGSC0003DMG400001398
PGSC0003DMG400018317
PGSC0003DMG400018442
PGSC0003DMG400010477
PGSC0003DMG402015022
PGSC0003DMG400024951
PGSC0003DMG400002498
PGSC0003DMG401001610
PGSC0003DMG400014972
PGSC0003DMG400030475
PGSC0003DMG400016442
PGSC0003DMG400022111
PGSC0003DMG400026719
PGSC0003DMG401022411
PGSC0003DMG400028169
PGSC0003DMG400002870
PGSC0003DMG400026181
PGSC0003DMG400014594
PGSC0003DMG400000063
PGSC0003DMG400022055
PGSC0003DMG401014410
PGSC0003DMG400011027
PGSC0003DMG400013588
PGSC0003DMG400008420
PGSC0003DMG400020729
PGSC0003DMG400027759
PGSC0003DMG400001345
PGSC0003DMG400019506
PGSC0003DMG400022260
PGSC0003DMG400003755
PGSC0003DMG400008269
PGSC0003DMG401019427
PGSC0003DMG400001017
PGSC0003DMG400008490
PGSC0003DMG400023180
PGSC0003DMG400030484
PGSC0003DMG400038827
PGSC0003DMG402029995
PGSC0003DMG400007528
PGSC0003DMG400016032
PGSC0003DMG401015009
PGSC0003DMG400008362
PGSC0003DMG400026472
PGSC0003DMG400007233
PGSC0003DMG400022135
PGSC0003DMG400009401
PGSC0003DMG400005857
PGSC0003DMG400026779
PGSC0003DMG400021114
PGSC0003DMG400007859
PGSC0003DMG400008804
PGSC0003DMG400014614
PGSC0003DMG400030504
PGSC0003DMG400005744
PGSC0003DMG401018787
PGSC0003DMG400028584
PGSC0003DMG400030321
PGSC0003DMG400039791
PGSC0003DMG400024967
PGSC0003DMG400030507
PGSC0003DMG400012168
PGSC0003DMG400025333
PGSC0003DMG400020523
PGSC0003DMG400029430
PGSC0003DMG400009968
PGSC0003DMG400011703
PGSC0003DMG400016590
PGSC0003DMG400017644
PGSC0003DMG400015211
PGSC0003DMG400010470
PGSC0003DMG400007794
PGSC0003DMG400014696
PGSC0003DMG400028967
PGSC0003DMG400018176
PGSC0003DMG402017464
PGSC0003DMG400006678
PGSC0003DMG400019276
PGSC0003DMG403006909
PGSC0003DMG400009141
PGSC0003DMG400007362
PGSC0003DMG400009880
PGSC0003DMG400012031
PGSC0003DMG400015533
PGSC0003DMG400027099
PGSC0003DMG400018650
PGSC0003DMG400005538
PGSC0003DMG400018886
PGSC0003DMG400027115
PGSC0003DMG400005937
PGSC0003DMG400007909
PGSC0003DMG400017327
PGSC0003DMG400017941
PGSC0003DMG400028349
PGSC0003DMG400029203
PGSC0003DMG400030198
PGSC0003DMG401023448
PGSC0003DMG402016602
PGSC0003DMG400010155
PGSC0003DMG400018616
PGSC0003DMG400025317
PGSC0003DMG401009819
PGSC0003DMG400014894
PGSC0003DMG400015659
PGSC0003DMG400006461
PGSC0003DMG400013506
PGSC0003DMG400023115
PGSC0003DMG400006208
PGSC0003DMG400009113
PGSC0003DMG400013632
PGSC0003DMG400018657
PGSC0003DMG400047044
PGSC0003DMG400010833
PGSC0003DMG400030693
PGSC0003DMG400017331
PGSC0003DMG400024596
PGSC0003DMG400020934
PGSC0003DMG400024690
PGSC0003DMG400043741
PGSC0003DMG400017245
PGSC0003DMG400009763
PGSC0003DMG400033041
PGSC0003DMG400031140
PGSC0003DMG400004436
PGSC0003DMG400017620
PGSC0003DMG400030826
PGSC0003DMG400011640
PGSC0003DMG400019477
PGSC0003DMG400038700
PGSC0003DMG400017101
PGSC0003DMG400036566
PGSC0003DMG400014054
PGSC0003DMG400013296
PGSC0003DMG400017384
PGSC0003DMG400013879
PGSC0003DMG400008836
PGSC0003DMG400012196
PGSC0003DMG400013424
PGSC0003DMG400008075
PGSC0003DMG400019120
PGSC0003DMG400020681
PGSC0003DMG400027861
PGSC0003DMG400031342
PGSC0003DMG400047213
PGSC0003DMG400027855
PGSC0003DMG400012503
PGSC0003DMG400025208
PGSC0003DMG402025899
PGSC0003DMG400005612
PGSC0003DMG400001455
PGSC0003DMG400007613
PGSC0003DMG400033650
PGSC0003DMG400001573
PGSC0003DMG400025851
PGSC0003DMG400014013
PGSC0003DMG401031022
PGSC0003DMG400003484
PGSC0003DMG400029396
PGSC0003DMG400016221
PGSC0003DMG400042837
PGSC0003DMG400002179
PGSC0003DMG400008441
PGSC0003DMG400016143
PGSC0003DMG400000064
PGSC0003DMG400007497
PGSC0003DMG400023822
PGSC0003DMG400008501
PGSC0003DMG400012681
PGSC0003DMG400014660
PGSC0003DMG400013199
PGSC0003DMG400022963
PGSC0003DMG401030816
PGSC0003DMG400007244
PGSC0003DMG400029966
PGSC0003DMG400022731
PGSC0003DMG400020623
PGSC0003DMG400008684
PGSC0003DMG400007070
PGSC0003DMG400027761
PGSC0003DMG403009622
PGSC0003DMG400028217
PGSC0003DMG400001335
PGSC0003DMG400000408
PGSC0003DMG400030691
PGSC0003DMG400020139
PGSC0003DMG400012421
PGSC0003DMG400018178
PGSC0003DMG400003584
PGSC0003DMG400046044
PGSC0003DMG400024202
PGSC0003DMG400009942
PGSC0003DMG400014238
PGSC0003DMG400009068
PGSC0003DMG401018368
PGSC0003DMG402027210
PGSC0003DMG400019825
PGSC0003DMG400010447
PGSC0003DMG400013215
PGSC0003DMG400028426
PGSC0003DMG400028435
PGSC0003DMG400025803
PGSC0003DMG400033914
PGSC0003DMG400023669
PGSC0003DMG400012355
PGSC0003DMG400012087
PGSC0003DMG400012224
PGSC0003DMG400009992
PGSC0003DMG400030557
PGSC0003DMG400027449
PGSC0003DMG400010631
PGSC0003DMG400025481
PGSC0003DMG400010870
PGSC0003DMG400024582
PGSC0003DMG400005109
PGSC0003DMG400003607
PGSC0003DMG402014138
PGSC0003DMG401004292
PGSC0003DMG401022475
PGSC0003DMG400019149
PGSC0003DMG400004643
PGSC0003DMG400035976
PGSC0003DMG400013389
PGSC0003DMG400014835
PGSC0003DMG400002856
PGSC0003DMG400001917
PGSC0003DMG400011180
PGSC0003DMG400023684
PGSC0003DMG400006183
PGSC0003DMG400028701
PGSC0003DMG400016173
PGSC0003DMG400006429
PGSC0003DMG402028252
PGSC0003DMG401031196
PGSC0003DMG400006989
PGSC0003DMG400024220
PGSC0003DMG400006606
PGSC0003DMG400013469
PGSC0003DMG400013717
PGSC0003DMG400014397
PGSC0003DMG400015906
PGSC0003DMG400021478
PGSC0003DMG400023483
PGSC0003DMG400026764
PGSC0003DMG400027758
PGSC0003DMG400034531
PGSC0003DMG402007649
PGSC0003DMG403011252
PGSC0003DMG400000431
PGSC0003DMG400033645
PGSC0003DMG400016029
PGSC0003DMG400009812
PGSC0003DMG400022223
PGSC0003DMG400024770
PGSC0003DMG400026846
PGSC0003DMG400007276
PGSC0003DMG400005957
PGSC0003DMG400000167
PGSC0003DMG400025098
PGSC0003DMG400012801
PGSC0003DMG400022655
PGSC0003DMG400023456
PGSC0003DMG400024755
PGSC0003DMG400009788
PGSC0003DMG401028844
PGSC0003DMG400012846
PGSC0003DMG400030577
PGSC0003DMG400027654
PGSC0003DMG400005216
PGSC0003DMG400011816
PGSC0003DMG400000922
PGSC0003DMG400030246
PGSC0003DMG400018614
PGSC0003DMG400004955
PGSC0003DMG402016617
PGSC0003DMG400010265
PGSC0003DMG400012911
PGSC0003DMG400012521
PGSC0003DMG400014277
PGSC0003DMG400001696
PGSC0003DMG402002771
PGSC0003DMG400033317
PGSC0003DMG400010022
PGSC0003DMG400008347
PGSC0003DMG400002901
PGSC0003DMG400008394
PGSC0003DMG400021039
PGSC0003DMG400024320
PGSC0003DMG400034882
PGSC0003DMG400019643
PGSC0003DMG400006047
PGSC0003DMG400004698
PGSC0003DMG400017100
PGSC0003DMG400012590
PGSC0003DMG400021677
PGSC0003DMG400032228
PGSC0003DMG400004351
PGSC0003DMG400003358
PGSC0003DMG400003210
PGSC0003DMG400000062
PGSC0003DMG400021292
PGSC0003DMG400012428
PGSC0003DMG400005115
PGSC0003DMG400023388
PGSC0003DMG400028891
PGSC0003DMG401023624
PGSC0003DMG400005803
PGSC0003DMG400015100
PGSC0003DMG400029826
PGSC0003DMG400010866
PGSC0003DMG400042965
PGSC0003DMG400006389
PGSC0003DMG400007469
PGSC0003DMG400014449
PGSC0003DMG400015977
PGSC0003DMG400018136
PGSC0003DMG400023039
PGSC0003DMG400025290
PGSC0003DMG400025830
PGSC0003DMG401011945
PGSC0003DMG400031348
PGSC0003DMG400003095
PGSC0003DMG400004263
PGSC0003DMG400010158
PGSC0003DMG400003536
PGSC0003DMG400032147
PGSC0003DMG400005794
PGSC0003DMG400003495
PGSC0003DMG400023506
PGSC0003DMG400027283
PGSC0003DMG401011224
PGSC0003DMG400023693
PGSC0003DMG400004547
PGSC0003DMG400027960
PGSC0003DMG400012887
PGSC0003DMG400028026
PGSC0003DMG400009947
PGSC0003DMG400017069
PGSC0003DMG400022406
PGSC0003DMG401034099
PGSC0003DMG400024232
PGSC0003DMG400018332
PGSC0003DMG400018275
PGSC0003DMG400008328
PGSC0003DMG401017546
PGSC0003DMG400010724
PGSC0003DMG400015817
PGSC0003DMG400009016
PGSC0003DMG400024661
PGSC0003DMG400006622
PGSC0003DMG400017629
PGSC0003DMG400000881
PGSC0003DMG400002775
PGSC0003DMG400012457
PGSC0003DMG400019919
PGSC0003DMG400020644
PGSC0003DMG400031171
PGSC0003DMG400020287
PGSC0003DMG400015385
PGSC0003DMG400000099
PGSC0003DMG401015876
PGSC0003DMG400004982
PGSC0003DMG400019243
PGSC0003DMG400012248
PGSC0003DMG400012316
PGSC0003DMG400008985
PGSC0003DMG400004936
PGSC0003DMG400042669
PGSC0003DMG400011394
PGSC0003DMG400021552
PGSC0003DMG400011399
PGSC0003DMG400002398
PGSC0003DMG400005806
PGSC0003DMG400014342
PGSC0003DMG400003510
PGSC0003DMG400024535
PGSC0003DMG400030434
PGSC0003DMG400003751
PGSC0003DMG400000785
PGSC0003DMG400032273
PGSC0003DMG400018658
PGSC0003DMG400019881
PGSC0003DMG400031145
PGSC0003DMG400000383
PGSC0003DMG400027313
PGSC0003DMG400020965
PGSC0003DMG400024803
PGSC0003DMG400007490
PGSC0003DMG400008242
PGSC0003DMG400010072
PGSC0003DMG400010491
PGSC0003DMG400011687
PGSC0003DMG400019445
PGSC0003DMG400022928
PGSC0003DMG400025274
PGSC0003DMG400031768
PGSC0003DMG400043512
PGSC0003DMG401003900
PGSC0003DMG400010484
PGSC0003DMG400030292
PGSC0003DMG404013246
PGSC0003DMG400002613
PGSC0003DMG401004946
PGSC0003DMG400023526
PGSC0003DMG400003461
PGSC0003DMG400023004
PGSC0003DMG400027354
PGSC0003DMG400025523
PGSC0003DMG402005180
PGSC0003DMG402016574
PGSC0003DMG400006458
PGSC0003DMG401003937
PGSC0003DMG402018787
PGSC0003DMG400027684
PGSC0003DMG400018281
PGSC0003DMG400009330
PGSC0003DMG400012582
PGSC0003DMG402027084
PGSC0003DMG400007309
PGSC0003DMG400029562
PGSC0003DMG401018424
PGSC0003DMG400017200
PGSC0003DMG400028819
PGSC0003DMG400024689
PGSC0003DMG400039347
PGSC0003DMG400006576
PGSC0003DMG402000528
PGSC0003DMG401024041
PGSC0003DMG400016448
PGSC0003DMG400024588
PGSC0003DMG400019735
PGSC0003DMG400014419
PGSC0003DMG400033147
PGSC0003DMG400017256
PGSC0003DMG400021691
PGSC0003DMG400024403
PGSC0003DMG400029867
PGSC0003DMG402012338
PGSC0003DMG400017454
PGSC0003DMG400029091
PGSC0003DMG400009049
PGSC0003DMG400004020
PGSC0003DMG401022351
PGSC0003DMG400014394
PGSC0003DMG400023913
PGSC0003DMG400025814
PGSC0003DMG400011458
PGSC0003DMG400023240
PGSC0003DMG400000894
PGSC0003DMG400002099
PGSC0003DMG400005785
PGSC0003DMG400010488
PGSC0003DMG400019803
PGSC0003DMG400021641
PGSC0003DMG400025871
PGSC0003DMG400027259
PGSC0003DMG400029262
PGSC0003DMG400037662
PGSC0003DMG400025985
PGSC0003DMG400029844
PGSC0003DMG400005840
PGSC0003DMG402010883
PGSC0003DMG400029467
PGSC0003DMG400019527
PGSC0003DMG400025169
PGSC0003DMG400017246
PGSC0003DMG400031000
PGSC0003DMG400033915
PGSC0003DMG400011057
PGSC0003DMG400020716
PGSC0003DMG400008640
PGSC0003DMG400003043
PGSC0003DMG400000188
PGSC0003DMG400018360
PGSC0003DMG400031765
PGSC0003DMG400003564
PGSC0003DMG400024749
PGSC0003DMG400023490
PGSC0003DMG400011929
PGSC0003DMG400022088
PGSC0003DMG400030430
PGSC0003DMG400002585
PGSC0003DMG400014240
PGSC0003DMG400020832
PGSC0003DMG401026555
PGSC0003DMG400016444
PGSC0003DMG400002519
PGSC0003DMG400031501
PGSC0003DMG400022526
[truncated: 18,868 more rows]
